1 **Contrasting drivers of abundant phage and prokaryotic communities in tropical, coastal**  
2 **ecosystems across the Isthmus of Panama**

3

4 Alaina R. Weinheimer<sup>1\*</sup>, Frank O. Aylward<sup>1,2</sup>, Matthieu Leray<sup>3</sup>, and Jarrod J. Scott<sup>3\*</sup>

5 1. Department of Biological Sciences, Virginia Tech, Blacksburg, VA, USA

6 2. Center for Emerging, Zoonotic, and Arthropod-borne Pathogens, Virginia Polytechnic  
7 Institute and State University, Blacksburg, VA 24061-0913

8 3. Smithsonian Tropical Research Institute, Balboa, Ancon, Republic of Panama

9

10 \*Correspondence to emails: [alainarw@vt.edu](mailto:alainarw@vt.edu) (ARW); email: [jarrod.jude.scott@gmail.com](mailto:jarrod.jude.scott@gmail.com) (JJS)

11

12 Competing Interests: The authors declare no competing interests.

13

14 Funding Support: This work was supported by grants from the Gordon and Betty Moore  
15 Foundation awarded to STRI and UC Davis (doi:10.37807/GBMF5603), the NSF CAREER  
16 award (IIBR-2141862) to FOA and a Simons Early Career Award in Marine Microbial Ecology  
17 and Evolution to FOA. ARW was supported by an ICTAS Doctoral Scholars Fellowship.

18

19

20

21 **Contrasting drivers of abundant phage and prokaryotic communities in tropical, coastal**  
22 **ecosystems across the Isthmus of Panama**

23

24 Alaina R. Weinheimer<sup>1\*</sup>, Frank O. Aylward<sup>1,2</sup>, Matthieu Leray<sup>3</sup>, and Jarrod J. Scott<sup>3\*</sup>

25 1. Department of Biological Sciences, Virginia Tech, Blacksburg, VA, USA

26 2. Center for Emerging, Zoonotic, and Arthropod-borne Pathogens, Virginia Polytechnic  
27 Institute and State University, Blacksburg, VA 24061-0913

28 3. Smithsonian Tropical Research Institute, Balboa, Ancon, Republic of Panama

29

30 \*Correspondence to emails: [alainarw@vt.edu](mailto:alainarw@vt.edu) (ARW); email: [jarrod.jude.scott@gmail.com](mailto:jarrod.jude.scott@gmail.com) (JJS)

31

32 **Keywords:** phage-host ecology, marine virology, coral reef microbiome, mangrove microbiome

33

34

35 **ABSTRACT**

36 Phages, or viruses that infect bacteria and archaea, are ubiquitous and abundant members of

37 Earth's ecosystems that impact the flow of nutrients, evolution of microbes, and food web

38 dynamics by selectively infecting and killing their prokaryotic hosts. Because phages can only

39 replicate through their hosts, they are inherently linked to processes impacting their hosts'

40 distribution and susceptibility to infection. Despite these links, phages can also be affected by

41 environmental parameters independent of their hosts, such as pH or salinity which impact cell

42 adsorption or virion degradation. To understand these complex links, in this study, we leverage

43 the unique ecological context of the Isthmus of Panama, which narrowly disconnects the

44 productive Tropical Eastern Pacific (TEP) and Tropical Western Atlantic (TWA) provinces and

45 compare factors that shape active marine phage and prokaryotic communities. Metagenomic

46 sequencing of seawater from mangroves and reefs of both the TEP and TWA coasts of Panama

47 suggest that pronounced environmental gradients, such as along the TEP mangrove rivers,

48 result in common dispersal and physicochemical parameters shaping both prokaryotic and

49 phage community composition and diversity. Conversely, we find that when environmental

50 conditions are relatively similar across adjacent habitats, such as between the mangroves and

51 reefs in the TWA, prokaryotic communities are more influenced by local abiotic conditions while

52 phage communities are shaped more by dispersal. Collectively, this work provides a framework

53 for addressing the co-variability between viruses and their hosts in marine systems and for  
54 identifying the different factors that drive consistent versus disparate trends in community shifts,  
55 which is essential to inform models of these interactions in biogeochemical cycling.

56

## 57 **INTRODUCTION**

58 Microbes are crucial components of Earth's ecosystems, particularly in the ocean, where they  
59 form the foundation of food webs, power biogeochemical cycles, and expand the ecological  
60 niches of plants and animals<sup>1,2</sup>. Outnumbering even microbes, viruses serve as major top-down  
61 control on microbial communities and modulate microbial ecology and evolution through  
62 selective killing via infections, horizontal gene transfer via transduction, and metabolic  
63 reprogramming during infections<sup>3</sup>. Understanding viral impacts on microbes is critical toward  
64 modeling the movement of nutrients through ecosystems<sup>4</sup>, the evolution of microbial  
65 pathogens<sup>5</sup>, and the dynamics of organismal-associated microbiomes<sup>6</sup>. While rapid advances in  
66 sequencing and microscopy technologies over the past few decades have begun to unfold the  
67 vast diversity, complexity, and breadth of viruses in nature<sup>7-9</sup>, major questions remain on which  
68 factors shape viral communities and how this relates to concomitant shifts in microbial  
69 communities.

70 Because viruses are restricted to reproducing through their hosts, viruses are inherently linked  
71 to processes related to their hosts' distribution and susceptibility to infection. Despite these tight  
72 links, patterns in the composition and diversity of these two groups can differ depending on the  
73 parameter or environment. Showing coupled shifts, for instance, viral diversity and microbial  
74 diversity in the ocean has been shown to increase with depth<sup>10,11</sup>, and the pH of soils has been  
75 shown to co-vary with viral and prokaryotic (bacteria or archaea) diversity<sup>12</sup>. In contrast to this  
76 coupling, a study examining soil communities and one on communities in freshwater springs  
77 showed that viral communities shifted over spatial scales and environmental parameters that did  
78 not always match that of microbes<sup>13,14</sup>. Several possibilities have been suggested to explain

79 these contrasts, such as a broader host range of viruses lowering the impact of available host  
80 composition on viral community structure<sup>15</sup>, or metacommunity dynamics<sup>14</sup> such as the  
81 importance of high dispersal versus species local adaptation that may differ between microbes  
82 and viruses. Taken together, these studies highlight the necessity to untangle the complexity in  
83 the link between viral communities and microbial communities, to better characterize roles of  
84 microbes and viruses in the environment.

85 In this study, we leverage the unique biogeography of the Isthmus of Panama to uncover factors  
86 shaping viral and microbial communities across a diverse array of tropical coastal environments  
87 in two oceans. The Isthmus of Panama gradually formed and finally completely disconnected  
88 the Tropical Western Atlantic Ocean (TWA) from the Tropical Eastern Pacific Ocean (TEP)  
89 approximately 2.8 million years ago<sup>16</sup>. The TWA became oligotrophic, leading to the proliferation  
90 of reef-building corals. The TEP remained eutrophic, with patchy coral reefs dominated by fewer  
91 species of scleractinian corals. Expansive mangroves thrive adjacent to coral reefs in both the  
92 TEP and the TWA. Nonetheless, mangroves of the TWA are influenced by much smaller tidal  
93 oscillations than in the TEP. In addition, the TWA supports thinner fringes of mangroves made  
94 of shorter trees than in the productive TEP<sup>17</sup>. These contrasting coasts with parallel habitat  
95 types of mangroves and coral reefs allow comparisons of viral and microbial communities at two  
96 spatial scales, locally between habitat types and globally between oceans<sup>18</sup>. Given the intrinsic  
97 link of viruses to their hosts, our null hypothesis was that factors shaping viral communities  
98 mirror those of microbial communities, and this similarity would be most visible at global scales  
99 between the oceans since the spatial separation and chemical differences between oceans are  
100 so large. An alternative hypothesis is that factors shaping viral communities would not match  
101 those of the corresponding microbial communities, and these differences would be most  
102 apparent at smaller scales where subtle differences in environmental parameters can influence  
103 contact rates of viruses to hosts, growth rates of hosts, and other physical aspects that may  
104 decouple viral communities from microbial communities.



105 To address these hypotheses, we examined both prokaryotic and viral community diversity in  
106 seawater metagenomes filtered for the 0.22-0.8  $\mu\text{m}$  size fraction. While most known viruses are  
107 smaller than 0.22  $\mu\text{m}$ , the viruses detected in this size fraction correspond to a subset of the  
108 viral community that includes larger viruses (e.g. jumbo bacteriophages), actively replicating  
109 (pre-lytic) viruses, lysogenic viruses (those integrated in the genomes of hosts) or viruses that  
110 have stuck to particles, putatively representing an active or abundant subset of the viral  
111 community<sup>19</sup>. Because viruses of bacteria and archaea that belong to the class *Caudoviricetes*  
112 are ubiquitous members of ecosystems, we focused our analyses on these viruses that we refer  
113 to as phages. For the microbes, we focused on the prokaryotes, as they are the putative host  
114 pool of the phages. To directly compare phage and prokaryotic diversity and minimize  
115 information loss, we applied a gene-based approach. We selected marker genes for both  
116 prokaryotes and phages that we benchmarked against more commonly used contig-based  
117 analyses.

118 Our results reveal a variety of contexts when factors shaping phage and prokaryotic  
119 communities align and when they diverge. Supporting our null hypothesis, the phage and  
120 prokaryotic communities were both distinct between oceans. The importance of habitat type,  
121 however, differed between these groups. Distinctions in phage community composition between  
122 mangroves and reefs depended on the ocean, with the mangrove communities being highly  
123 distinct from the reef communities in the TEP but not in the TWA, likely due to the strong salinity  
124 gradient of the mangrove rivers in the TEP. Meanwhile, the prokaryotic communities were  
125 equally distinct between the habitat types in both oceans. The lack of separation between the  
126 habitat types of the phage communities in the TWA compared to the prokaryotic communities  
127 suggests that changes in environmental parameters influence prokaryotic communities nearly  
128 equally as dispersal limits or physical separation, while phage communities are more structured  
129 by dispersal limitations than local conditions. Most strikingly, we found that phage communities  
130 were more diverse in the TWA, while prokaryotic communities were more diverse in the TEP,

131 suggesting phage production or breadth of host range may differ in ecosystems of the more  
132 productive island archipelago of the TEP than in the oligotrophic coastal bay of the TWA.  
133 Overall, these findings highlight the necessity to examine viruses with their potential host  
134 community together to better untangle processes driving their interactions with each other and  
135 the environment in natural, mixed communities. The contexts when phage and prokaryotic  
136 communities do not couple each other is crucial for modeling phage-host interactions as they  
137 relate to microbial mortality, and ultimately biogeochemical cycling in ecosystems.

138

## 139 **RESULTS AND DISCUSSION**

### 140 ***Benchmarking methods to assess phage and prokaryotic diversity.***

141 In total, fifty-seven samples of seawater from mangroves and reefs were collected from the  
142 TWA and TEP coasts of Panama for metagenomic sequencing (Figure 1). To directly compare  
143 phage and prokaryotic diversity and minimize information loss from the metagenomic data, we  
144 benchmarked and employed a novel gene-based approach (see Methods), in which families of  
145 the major capsid protein (MCP) and terminase large subunit (TerL) belonging to the class  
146 *Caudoviricetes* compiled from the Virus Orthologous Groups database (vogdb.org;  
147 Supplementary Dataset 2) were detected within the proteins of the contig assemblies from the  
148 metagenomes (Supplementary Dataset 2). Phage contigs were also detected for comparison.  
149 Reads from all samples were then mapped on to these sequences for their relative abundances  
150 in each sample (Supplementary Dataset 3, see Methods), and ecological statistics held for all  
151 three metrics (MCP, TerL, contigs; Supplementary Dataset 4). Results from TerL were reported  
152 here as this was the most prevalent gene (Supplementary Dataset 4) and enabled direct  
153 comparison with prokaryotic single-genes (versus metagenome assembled genomes).  
154 Prokaryotic diversity was detected with proteins families of three genes from the Clusters of  
155 Orthologous Groups (COG) database<sup>20</sup>: RNA polymerase  $\beta$  (COG85), RNA polymerase  $\beta'$   
156 (COG86), and a ribosome-binding ATPase YchF (COG12) which has been used in a previous

157 study<sup>21</sup>. Reads from all samples were then mapped on to these sequences for their relative  
158 abundances in each sample (Supplementary Dataset 3, see Methods), and ecological statistics  
159 held for all three metrics (COG85, COG86, COG12; Supplementary Dataset 4). The results of  
160 RNA polymerase  $\beta$  (COG85) are reported here as this was the most prevalent gene in the  
161 dataset (Supplementary Dataset 3). Details can be found in the Methods to use this approach  
162 for other datasets and studies.

163

164 ***Proximity and physicochemical variation determine whether factors shaping phage and***  
165 ***prokaryotic community composition align.***

166 When comparing the oceans, both phage and prokaryotic community composition significantly  
167 differed between the TEP and TWA (Figure 2a,b; ANOSIM  $p$  values < 0.05), and their variation  
168 correlated with each other (Mantel test  $p$  value < 0.05). The phage composition, however,  
169 differed to a larger extent than did the prokaryotic composition between the oceans, with only  
170 12% of phages found in both oceans (Figure 2g) compared to 24% of prokaryotes detected in  
171 both oceans (Figure 2h). Furthermore, more physicochemical parameters varied strongly with  
172 phage composition than with prokaryotic composition (Figure 2a,b). The stronger distinction of  
173 phage composition between oceans compared to prokaryotes may result from higher dispersal  
174 limitations of most phages in the ocean. Although some phages have been detected globally<sup>22</sup>,  
175 this cosmopolitan distribution may be less common for phages than for prokaryotes which could  
176 be investigated further in future studies.

177 Distinctions in community composition between the mangroves and reefs depended on the  
178 oceans. In the TEP, both phage and prokaryotic community compositions significantly differed  
179 between the habitat types (Figure 2e,f). In the TWA, only the prokaryotic composition was  
180 distinct (Figure 2d), and the phage composition did not differ (Figure 2c). In the TEP, eight of the  
181 twelve mangrove samples were collected along two rivers, with samples spanning from fully  
182 saline to fully freshwater. The other four mangrove samples were collected along a fully saline

183 mangrove channel (Supplementary Dataset 1). Although salinity is known as one the greatest  
184 factor limiting species ranges<sup>23,24</sup>, the separation of the prokaryotic and phage communities here  
185 appear to cluster by river rather than by salinity (Supplementary Figure 1). Nevertheless, the  
186 same physicochemical parameters seemed to vary with the both phage and prokaryotic  
187 community composition in the TEP (Figure 2e,f). This suggests that the phage and prokaryotic  
188 communities in the TEP are likely impacted by dispersal and environmental parameters  
189 similarly. Meanwhile in the TWA, physicochemical differences between mangroves and reefs  
190 were less pronounced than in the TEP (Supplementary Figure 2), and these habitats were  
191 closer in proximity (Figure 1). Despite the lower variation in physicochemical parameters within  
192 and between reef and mangrove habitats, prokaryotic community composition partitions  
193 between habitats. This suggests that prokaryotic communities may respond to factors that we  
194 have not measured in this study, such as the distribution of dissolved and particulate organic  
195 matter. The close proximity of the mangroves and reefs, however, may have resulted in high  
196 dispersal of phages between the habitat types leading to lower distinctions in the composition,  
197 as most phages were found in both habitat types (65%; Figure 2g). The dispersal of phages  
198 between habitat types can result in a lag or delay in the shifts of phage community structure to  
199 changes in host composition because phages can only replicate upon attaching to and infecting  
200 their hosts.

201 Taken together, these results suggest that phage and prokaryotic community composition align  
202 when environmental conditions and spatial scales strongly structure putative host communities  
203 such as for the TEP samples (Figure 2a,e,f). Meanwhile, when these parameters are less  
204 variable, as in the TWA here, dispersal forces may structure phage communities more so than  
205 for putative host communities (Figure 2b,c,d). Another explanation between uncoupled patterns  
206 of composition in the TWA could be that physicochemical parameters interact differently on the  
207 phage and prokaryotes. For instance, pH can impact the adsorption of phages to their hosts,

208 despite the presence of their hosts<sup>25</sup>. These parameters, however, would need to be tested  
209 directly.

210

211 ***The most prevalent and influential phages and prokaryotes distinguishing the***  
212 ***communities belong to diverse taxa and ecological groups.***

213 To determine which groups of phages and prokaryotes were driving the distinctions in the  
214 composition of communities, we classified the sequences using multiple approaches. The  
215 phages were classified based on the taxonomy of their putative host estimated by the alignment  
216 of the terminase large subunit (TerL) sequences to genes of RefSeq 207 and examining the  
217 host of the hits. RNA polymerase beta subunit (RNAP  $\beta$ ) sequences used to represent  
218 prokaryotic diversity here were classified based on the consensus classification of the contig on  
219 which the RNAP  $\beta$  was present (See Methods for details).

220 Of the top ten most prevalent genera based on average relative abundance across samples,  
221 only three genera overlapped for prokaryotes and putative phage hosts: *Synechococcus*,  
222 *Prochlorococcus*, and *Pelagibacter* (Figure 3). These genera are known as dominant members  
223 of the ocean<sup>26,27</sup>; furthermore, because the phage sequences may also correspond to integrated  
224 phages of the prokaryotic community, this may have resulted in the co-prevalence of these  
225 genera in both phage and prokaryotic communities. Nevertheless, the general lack of overlap in  
226 prevalent phage and prokaryotic genera may have resulted from several factors such as  
227 technical limitations in classifying both the phages and prokaryotic sequences or that most viral  
228 lysis occurs for rare but highly productive microbes, as has been observed off the coast of  
229 British Columbia in Canada<sup>28</sup>, which would result in dominant viruses that infect rarer hosts.

230 In general, the average genus composition of both the putative phage hosts and of the  
231 prokaryotes corroborate the compositional distinctions observed above when using sequence  
232 diversity (Figure 2), with the phage communities being highly similar between mangroves and  
233 reefs in the WA, but very distinct in the TEP (Figure 3b), and the prokaryotic communities being

234 distinct between mangroves and reefs in both oceans (Figure 3d). In both phages and  
235 prokaryotes, the enrichment of *Prochlorococcus* in the TEP relative to the TWA highlights the  
236 physicochemical features of the ocean, as the TEP sites were more exposed to pelagic waters  
237 than the TWA sites and *Prochlorococcus* is known to be more dominant in pelagic waters than  
238 coastal waters where *Synechococcus* is prevalent<sup>29</sup>. Notably, a fully freshwater sample  
239 (EPM\_13A, 0 ppt salinity) only contained *Prochlorococcus* of the top genera in the putative host  
240 community for the phages (Figure 4a). *Prochlorococcus* bacteria are rarely found in brackish or  
241 freshwater conditions<sup>30,31</sup>, and instead, a *Prochlorococcus*-like bacteria that is larger in cell size  
242 than its marine counterpart has been reported in estuaries<sup>31</sup>. Thus, the presence of this phage  
243 terminase with homology to that of a *Prochlorococcus* phage in the fully fresh sample suggests  
244 that either (i) this phage infects this *Prochlorococcus*-like freshwater bacteria, (ii) that it has a  
245 broad host range that enables it to infect marine and freshwater bacteria, (iii) or that its  
246 homology is a result of the limitation of the reference database. Of the prokaryotic community in  
247 this freshwater sample, only an unknown genus in the Proteobacteria phylum was found that  
248 was also prevalent in the other samples (Figure 4c), which is unsurprising as diverse  
249 Proteobacteria are common in freshwater systems<sup>32</sup>. The remarkable divergence of the genera  
250 in this freshwater sample for both the prokaryotes and putative host community of the phages  
251 highlights the crucial role of salinity in shaping microbial communities<sup>23,24</sup>.

252 We then examined which phages and prokaryotes drove the most variation between the  
253 samples, determined by those that significantly varied the most with variation in the  
254 communities (envfit test;  $p$  values < 0.05; See Methods; Supplementary Dataset 5). When  
255 examining all samples of both oceans and habitats, the phage (WA\_000000419261\_10), whose  
256 terminase showed high homology to that of the *Puniceispirillum* phage HMO-2011, drove the  
257 most variation followed by ten other equally influential phages that putatively infect a diversity of  
258 host genera (*Prochlorococcus*, *Puniceispirillum*, *Acinetobacter*, *Mycobacterium*, *Kiloniella*,  
259 *Laceyella*, *Escherichia*) spanning four phyla (Supplementary Dataset 5). Matching the whole

260 community distinctions between oceans and habitats of Figure 2, all but one of these 11 phages  
261 were exclusively detected in one ocean (TEP or TWA), with phages of the TWA mostly present  
262 in both mangroves and reefs and most of those exclusive to the TEP found only in mangrove  
263 samples. In contrast, variation in the prokaryotic communities was primarily driven by  
264 *Synechococcus* bacteria (top 3 most influential; Supplementary Dataset 5), which follows its  
265 known distinction between pelagic and coastal conditions<sup>29</sup>, such as the TEP between TWA  
266 here. The elevated importance of phages predicted to infect chemoheterotrophic in driving  
267 phage community composition compared to the elevated importance of photoautotrophic  
268 bacteria in driving prokaryotic community composition further highlights that phage lysis  
269 predominantly occurs on the most productive members of the community, which are often  
270 heterotrophic bacteria that experience boom-and-bust cycles as nutrients become available<sup>28</sup>.  
271 When examining samples of the TWA and TEP separately, the primary genera or putative host  
272 genera driving the variation in the prokaryotic and phage communities respectively aligned in  
273 trophic niche for the TWA but contrasted in trophic niche for the TEP. This is surprising because  
274 the phage and prokaryotic communities did not align in habitat distinction or physicochemical  
275 parameters driving their composition in the TWA (Figure 2c,d) but they did in the TEP (Figure  
276 2e,f). In the TWA, the two phages that drove most of the variation showed high homology to the  
277 terminase of *Pelagibacter* phage HTVC008M and the *Puniceispirillum* phage HMO-2011, host  
278 genera that are both heterotrophic bacteria found throughout the global ocean<sup>26,33</sup>. For the  
279 prokaryotes, the top genera also belonged to heterotrophic groups with the top prokaryote  
280 belonging to an uncultivated genus WTJO01 in the Puniceispirillales order, and the next most  
281 influential belonging to an uncultivated genus UBA974 in the Flavobacteriales order. These  
282 heterotrophic bacteria are also found throughout the oceans<sup>26,34</sup>. The overlap in trophic niche of  
283 these genera for driving the phage and prokaryotic communities in the TWA, despite the  
284 differences in physicochemical and habitat distinctions, highlights the robust conditions that



285 these groups can inhabit which could explain the lack of alignment in the environmental features  
286 driving the overall phage and prokaryotic community compositions.  
287 In contrast to the TWA, the putative hosts of phages driving the variation of phage communities  
288 within the TEP did not align trophically despite their overlap in significant physicochemical  
289 parameters and habitat distinctions (Figure 2e,f). The most influential phages primarily  
290 putatively infect bacteria belonging to the photosynthetic *Synechococcus* genus (seven of the  
291 top ten), while the most influential prokaryotes primarily belonged to unknown genera in the  
292 Betaproteobacteria class (Supplementary Dataset 5). Although these genera contrast each  
293 other in trophic lifestyles, these bacteria are known to be highly influenced by salinity<sup>31,35,36</sup>,  
294 which widely varied in the TEP as the mangrove samples were collected along freshwater  
295 rivers. These results suggest that while phage and prokaryotic communities both vary  
296 substantially with salinity, the types of bacteria and putative hosts of phages that are most  
297 affected by salinity in these sites do not necessarily align.

298

299 ***High prokaryotic diversity is rarely coupled with high phage diversity.***

300 Through selective killing by phages and resistance mechanisms by prokaryotes, phages and  
301 prokaryotes are known to drive each other's evolution and microdiversity<sup>37,38</sup>, but how these  
302 interactions impact macrodiversity remains poorly studied. Here, we examined the alpha  
303 diversity of samples to uncover which environments contain high phage and prokaryotic  
304 sequence diversity. We used the Shannon's Diversity index to measure alpha diversity, as this  
305 metric accounts for both richness and evenness<sup>39</sup>. Taxa are proxied here as unique marker  
306 sequences (see Methods). When comparing diversity between oceans, surprisingly, phage  
307 communities were significantly more diverse in the TWA (Figure 4a) while prokaryotes were  
308 more diverse in the TEP (Figure 4b). These patterns between the oceans held when comparing  
309 mangrove and reef samples separately (Supplementary Figure 3). The contrasting diversity  
310 patterns of phage and prokaryotes between oceans may be a result of several abiotic and biotic



311 factors. Although the TWA is generally more oligotrophic than the TEP, the bay where the  
312 samples were collected in this study has historically been subject to high levels of runoff, which  
313 has been found to elevate bacterial production and density but result in decreased bacterial  
314 diversity compared to nearby pristine sites<sup>40</sup>. Thus, the reduced prokaryotic diversity in the  
315 TWA compared to the TEP may be due to the pollutants, while the elevated phage diversity in  
316 the TWA compared to the TEP may be due to increased bacterial production and thus phage  
317 replication and release. Alternatively, the higher phage diversity in an environment that has  
318 lower prokaryotic diversity could be because a variety of phages infect the same hosts. This  
319 would mean that a low diversity of phages could infect a high diversity of prokaryotes. The  
320 ecological conditions that would enable the coexistence of diverse phages that infect the same  
321 host may be related to the contact rates with hosts<sup>41</sup> or flux between environments introducing  
322 novel phages, which may differ between the TEP and TWA, but these would need to be tested  
323 directly.

324 We then examined diversity within each ocean between habitat types. Within the TWA, phage  
325 communities were equally diverse between the mangroves and reefs (Figure 4d). Similarly,  
326 prokaryotic communities were equally diverse between mangroves and reefs in TWA (Fig 4e),  
327 despite significant differences in their composition between these habitat types (Figure 2d). In  
328 the TEP, phage diversity was lower in the mangroves than the reefs (Figure 4g), but prokaryotic  
329 diversity did not significantly differ between the habitat types, despite having significantly  
330 different composition (Fig 2f). This lack of alignment between the habitat types for prokaryotes  
331 in compositional variation and Shannon's demonstrates that high diversity within samples (alpha  
332 diversity) does not always correspond to high diversity between samples (beta diversity)<sup>42</sup>. For  
333 example, a study by Walters and Martiny (2020)<sup>42</sup> that compared the microbial diversity across  
334 a range of ecosystems found that soil samples have the highest number of microbial species  
335 (alpha diversity), but sediment, biofilms, and inland waters had the greatest variation in  
336 communities between samples (beta diversity). The conflicting alpha and beta diversity patterns

337 of the prokaryotic communities here thus suggest that perhaps niche space is similar across  
338 habitat types leading to similar alpha diversity but competition, or local adaptation, within each  
339 habitat is strong enough to lead to distinct members of each community or strong beta diversity.  
340 Regarding the phage diversity patterns, the lower diversity of the phage communities in the  
341 mangroves than reefs in the TEP is likely due to salinity differences between these habitat  
342 types, with a median 28.93 ppt in the mangroves versus. 30.655 ppt in the reefs. Furthermore,  
343 the mangroves were more acidic than the reefs (median pH 7.885 vs 8.09). While these  
344 physicochemical differences between TEP mangroves and reef did not manifest in prokaryotic  
345 diversity differences, the phage diversity may have been impacted, as pH and salinity are  
346 known to impact adsorption rates of phages to their hosts<sup>25,43</sup>.

347 When plotting phage diversity against prokaryotic diversity, we found that phage diversity rarely  
348 correlates with prokaryotic diversity, despite the inherent link of phages to their hosts for  
349 replication. In fact, in the TWA samples, their diversities appear to negatively correlate when  
350 examining all TWA samples together and separately by habitat type, but this was not significant  
351 (Fig 2c,f). In the TEP, there is a significant positive correlation when examining the samples  
352 together (Fig 2c), but this is likely driven by the mangrove samples (Fig 2i), as there was no  
353 significant correlation between phage and prokaryotic diversity the TEP reef samples (Figure  
354 2i). The positive correlation of phage and prokaryotic diversity in the TEP is likely due to salinity  
355 differences in the TEP mangrove samples, with two considered freshwater (~0 ppt). Upon  
356 removing these two fresh samples, the correlation of diversities is no longer significant  
357 (Supplementary Figure 4), highlighting the impact of extreme salinity differences on phage-host  
358 interactions<sup>43</sup>.

359 **Differences in correlations with physicochemical parameters between phage and**  
360 **prokaryotes help explains their decoupled relationship.**

361 Because phage and prokaryotic diversity rarely correlated with each other here, we plotted  
362 phage and prokaryotic diversity against the measured physicochemical parameters of each

363 environment to uncover other potential drivers of their diversity separately (Figure 5). Following  
364 our hypothesis that phage and prokaryotic diversity patterns will align most when environmental  
365 gradients are high, their diversities generally correlated in the same direction with most of the  
366 parameters in the TEP, which had great variation in the parameters compared to the TWA  
367 samples. For example, salinity varied widely between the mangrove samples of the TEP (0-30  
368 ppt), and phage and prokaryotic diversity both significantly positively correlated with salinity.  
369 Meanwhile, in the TWA salinity only ranged between 32 and 34 ppt, and phage and prokaryotic  
370 diversities tended to correlate with the parameters in the opposite directions of each other. In  
371 both mangroves and reefs of the TWA, phage diversity correlated negatively with salinity while  
372 prokaryotic diversity correlated positively with salinity.  
373 Taken together, the lack of strong relationship between phage and prokaryotic diversity (Figure  
374 4), in addition to their inconsistent correlations with the physicochemical parameters measured  
375 here (Figure 5), exemplify the nuances in the relationship between the viral and host diversity.  
376 For instance, variation in phage host ranges or variation in host resistance to phage infections  
377 could weaken the correlation of their diversities. Furthermore, environmental variation may  
378 further decouple their diversity relationship. Our results suggest that when this environmental  
379 variation or spatial distances are relatively small between sites, such as between habitat types  
380 of the TWA, prokaryotic diversity may be impacted more than phage diversity by these local  
381 conditions. Future work could include measuring host production, phage production, and phage  
382 host ranges in isolation against different physicochemical parameters to test these hypotheses  
383 more directly.

384

## 385 **CONCLUSION**

386 In this study, we leveraged the unique biogeography of the Isthmus of Panama to compare  
387 drivers of phage and prokaryotic diversity at both global scales between oceans and local  
388 scales between habitat types within each ocean by examining mangrove and reef habitats of the

389 TEP and TWA coasts (Figure 1). We found that drivers of phage and prokaryotic communities  
390 align most when physicochemical and spatial scales are sharp, such as between the oceans  
391 and between the TEP mangroves and reefs. Meanwhile, these factors diverge when there are  
392 subtle physicochemical differences and minimal physical separation in environments, like  
393 between the mangroves and reefs of the TWA. In these cases, prokaryotic communities may  
394 locally adapt to the minor environmental differences, as we observed distinction between  
395 prokaryotic communities of the mangroves and reefs. The phage communities, however, may  
396 be influenced more by high dispersal between the environments, overwhelming environmental  
397 or habitat distinctions, as we observed no significant difference between mangroves and reefs  
398 of the TWA. A similar pattern has been observed in a freshwater spring system of southern  
399 Florida, where the prokaryotic communities were distinct between the river, head, and mixed  
400 zones, but the phages communities were not distinct between the head and mixed zone, which  
401 the authors attributed potentially to high dispersal of phages between these two zones<sup>14</sup>.  
402 Despite cases when drivers of phage and prokaryotic community composition align, our results  
403 show that putative host genera of phages that drive phage communities differ from prokaryotes  
404 in all spatial and physicochemical scales. Very few of the most dominant phage members infect  
405 genera of the most dominant prokaryotes. This may be because most phages are infecting the  
406 most productive prokaryotes which exhibit boom and bust reproductive cycles, rather than the  
407 most stably abundant<sup>28</sup>. This infection pattern would support the popular phage-host interaction  
408 model, the Kill-the-Winner model, in which phages rise in abundance to kill the most dominant  
409 prokaryotes<sup>44</sup>. However, deviations from the Kill-the-Winner model have been observed in a  
410 freshwater lake where the abundance of some phages have been found to peak before, during,  
411 or after their host's peak in abundance<sup>45</sup>, and we would thus need time series data to resolve  
412 this possibility.  
413 Counterintuitively, we found that high phage diversity is rarely coupled with high host diversity.  
414 The only context when their diversity correlated was in the TEP mangrove samples when fully

415 freshwater samples were included, which points to the strong role of salinity in shaping both  
416 prokaryotic and phage communities<sup>23,43</sup>. Because phage diversity was higher in the TWA than  
417 the TEP, we suspect that host production rates may drive phage diversity such that even if there  
418 are blooms of a single bacteria, a variety of phages may surface to infect that host. Conversely,  
419 a lower phage diversity amidst high prokaryotic diversity may result if phages have broad host  
420 ranges, which may be related to host contact rates<sup>41</sup>. We also saw that phage and prokaryotic  
421 diversity can be driven by physicochemical parameters differently and align the least when  
422 environmental variation and physical separation is subtle, such as in the TWA sites, compared  
423 to when they are more pronounced, such as in the TEP sites. Together, these trends indicate  
424 that the strength of the link of phage communities between potential host communities depends  
425 on the level of variation in the environment. Future work that includes additional measurements  
426 such as phage production, prokaryotic growth, organic matter concentrations, and more could  
427 reveal more precise dials in the constraints on the link in patterns of phage communities to  
428 those of prokaryotic communities.

429 All in all, this study provides a framework and demonstrates an application for comparing phage  
430 and prokaryotic community composition and diversity in a variety of marine environments. We  
431 uncover conditions when the tight links of phages and prokaryotes result in similar factors  
432 driving their diversity and composition, such as between oceans, and when these tight links are  
433 weakened, such as between adjacent but distinct habitat types. By understanding when these  
434 phage-host links are strengthened or weakened, we can better predict the outcome of  
435 interactions between phages and prokaryote populations of different environments to inform  
436 models of nutrient cycling mediated by microbes and the release of organic matter through viral  
437 lysis of microbes.

438

## 439 **METHODS**

### 440 **Sample and environmental data collection.**

441 Seawater samples were collected ~1m above the seafloor on coral reefs and mangroves (1-4m  
442 depth) in the TEP and TWA coasts of Panama in 2017 (see Supplementary Dataset 1 for  
443 coordinates and collection dates). Seawater samples were collected in sterile Whirl-Pak Bags  
444 and kept on ice and in the dark until filtration at either the Smithsonian Tropical Research  
445 Institute (STRI) Coiba (TEP) or Bocas del Toro research stations (TWA), where they were then  
446 vacuum filtered through 0.22 µm nitrocellulose membranes (Millipore). Filters were frozen and  
447 transported to STRI's molecular facility at Isla Naos Laboratory in Panama City in liquid nitrogen  
448 and stored at -80 °C until DNA extractions. DNA was extracted from each filter using a Qiagen  
449 Powersoil extraction kit following the manufacturer's protocol with minor modifications to  
450 increase the yield<sup>46</sup>. Metagenomic shotgun libraries were prepared with the Illumina DNA  
451 Nextera Flex kit following the manufacturer's protocol. Shotgun metagenomics reads were  
452 sequenced on an Illumina Nextseq platform. Dissolved oxygen, temperature, salinity, and pH  
453 were measured with a pre-calibrated Professional Plus handheld YSI (Yellow Springs, USA).

#### 454 **Metagenome preparation, sequencing, and assembly.**

455 We used Trimmomatic (v0.39)<sup>47</sup> for adapter clipping and initial quality trimming of raw  
456 metagenomic data (N = 57). We used anvio (v7.1)<sup>48</sup> to build a Snakemake (v.5.10.0)<sup>49</sup> workflow  
457 for co-assembly analysis. In the workflow, we used `iu_filter_quality_minocche` from the Illumina  
458 Utils package (v2.12)<sup>50</sup> for additional quality filtering and MEGAHIT (v1.2.9)<sup>51</sup> for co-assembly (`-`  
459 `min-contig-len: 1000, -presets: meta-sensitive`). We performed three separate co-assemblies  
460 using MEGAHIT based on initial assessment of the metagenomic data. All TWA samples (reef  
461 and mangrove) were co-assembled (n = 29); from the TEP, we performed one co-assembly for  
462 reef samples (n = 16) and another for mangrove samples (n = 12). Next, we used `anvi-gen-`  
463 `contigs-database` to generate a database of contigs. Within the Snakemake workflow,  
464 KrakenUniq (v0.5.8)<sup>52</sup> was used for taxonomic classification of short reads against a user-  
465 constructed database of archaea, bacteria, viral, fungi, and protozoa reads from RefSeq and the

466 NCBI nt database. Taxonomic classification of contigs was performed using Centrifuge  
467 (v1.0.4\_beta)<sup>53</sup>, against the bacterial, archaeal, human, and viral genomes database.

468 **Phage marker gene and contig curation.**

469 For the marker gene detection, open reading frames (ORFs) were predicted with prodigal<sup>54</sup> (-p  
470 meta -a -d) on contigs of all sizes (753,612 EP; 574,304 WA contigs | 2,168,906 EP; 1,756,476  
471 WA ORFs; 3,925,382 total ORFs). Amino acid sequences of the ORFs were then searched  
472 against all MCP and TerL HMM profiles available in Virus Orthologous Group database  
473 (vogdb.org) version 208 (Supplementary Dataset 2) using hmmsearch (hmmer.org; E value <  
474 0.00001, bitscores > 41 and > 33, respectively, minimum length of open reading frame >=826  
475 and >= 885 nucleotides, respectively). The threshold bitscores were determined by searching  
476 proteins predicted with prodigal (default per genome) from all *Caudovirales* genomes from Viral  
477 Genomes Portal downloaded on July 26, 2021 against the MCP and TerL profiles, taking the top  
478 hit from each genome and identifying the minimum bitscore required to include at least 98% of  
479 hits. After filtering for bitscore, the minimum length of a hit was decided based on containing at  
480 least 98% of those reference hits. This resulted in 3,749 MCP genes and 5,369 TerL genes.  
481 These were then de-replicated at 100% identity across the entire length of one sequence using  
482 BLASTn<sup>55</sup>, which resulted in 3,722 representative MCP and 5,350 TerL (See Data Availability).  
483 For the detection of phage contigs, contigs over 10 kilobases (7,619 EP; 10,839 WA) were run  
484 through VirSorter2<sup>56</sup> and CheckV<sup>57</sup> as follows. First, contigs over 10 kilobases (EP: 7,619, WA:  
485 10,839;) were run through VirSorter2 (virsorter run --min-score 0.5 all) and retained if they  
486 scored over 0.5 for dsDNAphage as their max\_group (EP: 1,513, WA: 3,272). These contigs  
487 were then run through CheckV (checkv end\_to\_end) to trim potential host genomes flanking the  
488 contigs. Trimmed provirus and virus sequences were combined and filtered for at least 10kb  
489 (EP: 1,482, WA: 3,203). The trimmed sequences were then run through VirSorter again and  
490 retained if they scored over 0.95 or scored at least 0.5 and encoded at least 2 phage hallmark



491 genes. This resulted in 3,885 contigs. Virus detection summary for each contig is in

492 Supplementary Dataset 2.

#### 493 **Prokaryote marker gene curation.**

494 The same ORF and amino acid sequences used for the phage marker gene detection were  
495 searched against HMM profiles corresponding to genes to the Clusters of Orthologous Groups  
496 (COG) protein families of COG0012 (COG12, ribosome-binding ATP-ase), COG0085 (COG85,  
497 RNA polymerase  $\beta$  subunit), and COG0086 (COG86, RNA polymerase  $\beta'$  subunit)<sup>20</sup> jointly using  
498 hmmsearch (E value < 0.00001, bitscores cutoffs of 210, 200, and 200 respectively<sup>58</sup>. See  
499 Supplementary Dataset 4 for the number of hits of each gene.

#### 500 **Distribution detection.**

501 Reads from all samples were subset to an even depth to the number of reads in the sample with  
502 the fewest reads (2,992,107 reads) with seqkit<sup>59</sup> sample (-s 1000, -2). Reads were then mapped  
503 to an index of the phage marker genes, phage contigs, and prokaryote marker genes made with  
504 minimap2<sup>60</sup> -x sr. CoverM<sup>61</sup> (<https://github.com/wwood/CoverM>) was then used for the mapping  
505 (coverm contig --min-read-percent-identity 95 -m covered\_fraction rpkm count variance length --  
506 minimap2-reference-is-index --min-covered-fraction 0 --coupled ) and retained with 50% gene  
507 covered or 20% of contig covered<sup>62</sup> (Supplementary Dataset 3). See Supplementary Dataset 4  
508 for the number of each sequence type detected in at least one sample.

#### 509 **Visualizations, statistical analyses and sequence benchmarking.**

510 All plots aside from the maps were created in R (version 3.5.1)<sup>63</sup> with Rstudio (version 1.1.456)<sup>64</sup>  
511 using vegan<sup>65</sup>, ggpubr<sup>66</sup>, and ggplot2 (3.1.1)<sup>67</sup>. Maps were created with QGIS (3.24) using the  
512 Voyager plug-in for the base and overlaid with sample data. Because statistics and trends held  
513 regardless of protein examined per bacteria or phage (Supplementary Dataset 4), we focused  
514 on the TerL results to represent phage diversity and COG85 results to represent bacterial  
515 diversity, as these genes were the most prevalent in the dataset. Influential sequences and  
516 physicochemical parameters were identified by those varying the most with variation in the



517 communities of all samples based on significant vector length (vegan package function envfit,  
518 perm=999, na.rm=TRUE; calculated with |NMDS1-NMDS2|; *p* values < 0.01). Community  
519 composition of samples were compared and visualized in non-metric dimensional scaling  
520 (NMDS) plots using Bray-Curtis distances of relative abundances calculated with reads per  
521 kilobase per million (RPKM) using vegan (metaMDS(distance = "bray")). Two outlier samples  
522 were excluded in the community compositional analyses as these were highly divergent  
523 (WAM\_TWN and EPM\_13A1) and skewed the results (Supplementary Figure 4, 5). WAM\_TWN  
524 was sampled in a highly polluted site, and EPM\_13A1 was sampled from a completely  
525 freshwater sample, which likely resulted in their aberrant community compositions at the genus-  
526 level (Figure 3c,d). Significant distinctions between oceans and habitat types were determined  
527 with ANOSIM test (vegan package) based on Bray-Curtis dissimilarity matrices using the RPKM  
528 data (anosim(distance="bray",permutations=9999)).

#### 529 **Gene taxonomy.**

530 Prokaryotic sequences corresponding to COG85 were classified via Centrifuge<sup>53</sup>. For the  
531 phages, amino acid sequences of TerL genes were aligned to RefSeq 207 with LAST<sup>68</sup> (lastal -  
532 m 10 -f BlastTab; E value cutoff  $10^{-5}$ ), and the taxonomy of the hit's host was reported (i.e. a hit  
533 to a *Prochlorococcus* phage meant the taxonomy of *Prochlorococcus* was reported). The top hit  
534 was detected based on percent identity. The top 10 genera based on average relative  
535 abundance across samples was reported.

536

#### 537 **DATA AVAILABILITY**

538 Reads from metagenomes will be deposited on the European Nucleotide Archive upon  
539 publication. Sequences of marker genes and phage contigs can be found on the FigShare  
540 repository upon publication, along with the VOG and COG HMM profiles used for marker gene  
541 detection.

542

543 **CODE AVAILABILITY**

544 Custom scripts used for this study are found in the GitHub repository  
545 ([https://github.com/scubalaina/panama\\_phages](https://github.com/scubalaina/panama_phages)).

546

547 **SUPPLEMENTARY FIGURES**

548 Supplementary Figures can be found at the link here:  
549 [https://github.com/scubalaina/panama\\_phages/blob/main/Supplementary\\_Figures.pdf](https://github.com/scubalaina/panama_phages/blob/main/Supplementary_Figures.pdf).

550

551

552 **ACKNOWLEDGEMENTS**

553 We thank members of the Aylward Lab for helpful feedback. We thank the Smithsonian Tropical  
554 Research Institute staff at the Bocas del Toro and Naos stations. This work was performed  
555 using compute nodes available at the Virginia Tech Advanced Research and Computing Center  
556 and on the Smithsonian High-Performance Cluster (SI/HPC), Smithsonian Institution  
557 (doi:10.25572/SIHPC). This work was supported by grants from the Gordon and Betty Moore  
558 Foundation awarded to STRI and UC Davis (doi:10.37807/GBMF5603), the NSF CAREER  
559 award (IIBR-2141862) to FOA and a Simons Early Career Award in Marine Microbial Ecology  
560 and Evolution to FOA. ARW was supported by an ICTAS Doctoral Scholars Fellowship.  
561 Research permits were provided by the Autoridad Nacional del Ambiente de Panamá.

562

563 **AUTHOR CONTRIBUTIONS**

564 JJS and ML collected the samples for sequencing and the associated metadata; they also  
565 processed the samples and sent them for sequencing. JJS performed initial sequence data  
566 processing, quality control, and assembly. ARW and FOA designed the data analysis. ARW  
567 performed the data analysis and developed the manuscript. All authors contributed to the  
568 interpretation and writing of the manuscript.

569

570 **REFERENCES**

- 571 1. Falkowski, P. G., Fenchel, T. & Delong, E. F. The microbial engines that drive Earth's  
572 biogeochemical cycles. *Science* **320**, 1034–1039 (2008).
- 573 2. Wilkins, L. G. E. et al. Host-associated microbiomes drive structure and function of marine  
574 ecosystems. *PLoS Biol.* **17**, e3000533 (2019).
- 575 3. Brussaard, C. P. D. et al. Global-scale processes with a nanoscale drive: the role of marine  
576 viruses. *ISME J.* **2**, 575–578 (2008).
- 577 4. Proctor, L. M. & Fuhrman, J. A. Viral mortality of marine bacteria and cyanobacteria. *Nature*  
578 **343**, 60–62 (1990).
- 579 5. LeGault, K. N. et al. Temporal shifts in antibiotic resistance elements govern phage-  
580 pathogen conflicts. *Science* **373**, (2021).
- 581 6. Wahida, A., Tang, F. & Barr, J. J. Rethinking phage-bacteria-eukaryotic relationships and  
582 their influence on human health. *Cell Host Microbe* **29**, 681–688 (2021).
- 583 7. Sullivan, M. B., Weitz, J. S. & Wilhelm, S. Viral ecology comes of age. *Environ. Microbiol.*  
584 *Rep.* **9**, 33–35 (2017).
- 585 8. Aylward, F. O. & Moniruzzaman, M. Viral complexity. *Biomolecules* **12**, (2022).
- 586 9. Mizuno, C. M., Rodriguez-Valera, F., Kimes, N. E. & Ghai, R. Expanding the marine  
587 virosphere using metagenomics. *PLoS Genet.* **9**, e1003987 (2013).
- 588 10. Luo, E., Eppley, J. M., Romano, A. E., Mende, D. R. & DeLong, E. F. Double-stranded DNA  
589 virioplankton dynamics and reproductive strategies in the oligotrophic open ocean water  
590 column. *ISME J.* **14**, 1304–1315 (2020).
- 591 11. Gregory, A. C. et al. Marine DNA viral macro- and microdiversity from pole to pole. *Cell*  
592 **177**, 1109–1123.e14 (2019).
- 593 12. Lee, S. et al. Soil pH influences the structure of virus communities at local and global  
594 scales. *Soil Biol. Biochem.* **166**, 108569 (2022).

- 595 13. Santos-Medellin, C. et al. Viromes outperform total metagenomes in revealing the  
596 spatiotemporal patterns of agricultural soil viral communities. *ISME J.* **15**, 1956–1970  
597 (2021).
- 598 14. Malki, K. et al. Spatial and temporal dynamics of prokaryotic and viral community  
599 assemblages in a lotic system (Manatee Springs, Florida). *Appl. Environ. Microbiol.* **87**,  
600 e0064621 (2021).
- 601 15. de Jonge, P. A., Nobrega, F. L., Brouns, S. J. J. & Dutilh, B. E. Molecular and evolutionary  
602 Determinants of bacteriophage host range. *Trends Microbiol.* **27**, 51–63 (2019).
- 603 16. O’Dea, A. et al. Formation of the Isthmus of Panama. *Sci Adv* **2**, e1600883 (2016).
- 604 17. D’Croze, L. Status and uses of mangroves in the Republic of Panama. *Conservation and*  
605 *sustainable utilization of mangrove forests in Latin America and Africa Regions Part I.*  
606 *ITTO/ISME Mangrove Ecosystems Technical Reports, Okinawa Japan.* 115-127 (1993).
- 607 18. Leray, M. et al. Natural experiments and long-term monitoring are critical to understand and  
608 predict marine host–microbe ecology and evolution. *PLoS Biol.* **19**, e3001322 (2021).
- 609 19. López-Pérez, M., Haro-Moreno, J. M., Gonzalez-Serrano, R., Parras-Moltó, M. &  
610 Rodriguez-Valera, F. Genome diversity of marine phages recovered from Mediterranean  
611 metagenomes: Size matters. *PLoS Genet.* **13**, e1007018 (2017).
- 612 20. Galperin, M. Y. et al. COG database update: focus on microbial diversity, model organisms,  
613 and widespread pathogens. *Nucleic Acids Res.* **49**, D274–D281 (2021).
- 614 21. Mende, D. R. et al. Environmental drivers of a microbial genomic transition zone in the  
615 ocean’s interior. *Nat Microbiol* **2**, 1367–1373 (2017).
- 616 22. Breitbart, M., Miyake, J. H. & Rohwer, F. Global distribution of nearly identical phage-  
617 encoded DNA sequences. *FEMS Microbiol. Lett.* **236**, 249–256 (2004).
- 618 23. Logares, R. et al. Infrequent marine–freshwater transitions in the microbial world. *Trends*  
619 *Microbiol.* **17**, 414–422 (2009).
- 620 24. Cabello-Yeves, P. J. & Rodriguez-Valera, F. Marine-freshwater prokaryotic transitions

- 621 require extensive changes in the predicted proteome. *Microbiome* **7**, 117 (2019).
- 622 25. Binetti, A. G., Quiberoni, A. & Reinheimer, J. A. Phage adsorption to *Streptococcus*  
623 *thermophilus*. Influence of environmental factors and characterization of cell-receptors.  
624 *Food Res. Int.* **35**, 73–83 (2002).
- 625 26. Morris, R. M. et al. SAR11 clade dominates ocean surface bacterioplankton communities.  
626 *Nature* **420**, 806–810 (2002).
- 627 27. Fuhrman, J. A., Cram, J. A. & Needham, D. M. Marine microbial community dynamics and  
628 their ecological interpretation. *Nat. Rev. Microbiol.* **13**, 133–146 (2015).
- 629 28. Zhong, K. X., Wirth, J. F., Chan, A. M. & Suttle, C. A. Mortality by ribosomal sequencing  
630 (MoRS) provides a window into taxon-specific cell lysis. *ISME J.* (2022)  
631 doi:10.1038/s41396-022-01327-3.
- 632 29. Partensky, F. & Blanchot, J. Differential distribution and ecology of *Prochlorococcus* and  
633 *Synechococcus* in oceanic waters: a review. *Bull. Inst. Med. Res. Kuala Lumpur.* 457-476  
634 (1999).
- 635 30. Vaultot, D., Partensky, F. & Neveux, J. Winter presence of prochlorophytes in surface  
636 waters of the northwestern Mediterranean Sea. *Limnology and Oceanography.* **35**, 1156-  
637 1164 (1990).
- 638 31. Shang, X., Zhang, L. H. & Zhang, J. *Prochlorococcus*-like populations detected by flow  
639 cytometry in the fresh and brackish waters of the Changjiang Estuary. *Journal of the Marine*  
640 *Biological* **3**, (2007).
- 641 32. Zwart, G., et al. Typical freshwater bacteria: an analysis of available 16S rRNA gene  
642 sequences from plankton of lakes and rivers. *Aquat. Microb. Ecol.* **28**, 141-155 (2002).
- 643 33. Huang, S., Wilhelm, S. W., Harvey, H. R., Taylor, K. & Jiao, N. Novel lineages of  
644 *Prochlorococcus* and *Synechococcus* in the global oceans. *ISME J.* **6**, 285-297 (2012).
- 645 34. Kirchman, D. The ecology of *Cytophaga*–*Flavobacteria* in aquatic environments. *FEMS*  
646 *Microbiol. Ecol.* **39**, 91–100 (2002).

- 647 35. Garneau, M. E., Vincent, W. F., Alonso-Sáez, L., Gratton, Y. & Lovejoy, C. Prokaryotic  
648 community structure and heterotrophic production in a river-influenced coastal arctic  
649 ecosystem. *Aquat. Microb. Ecol.* **42**, 27–40 (2006).
- 650 36. Waterbury, J. B. & Valois, F. W. Resistance to co-occurring phages enables marine  
651 *Synechococcus* communities to coexist with cyanophages abundant in seawater. *Appl.*  
652 *Environ. Microbiol.* **59**, 3393–3399 (1993).
- 653 37. Hussain, F. A. et al. Rapid evolutionary turnover of mobile genetic elements drives bacterial  
654 resistance to phages. *Science* **374**, 488–492 (2021).
- 655 38. Ahlgren, N. A., Perelman, J. N., Yeh, Y.-C. & Fuhrman, J. A. Multi-year dynamics of fine-  
656 scale marine cyanobacterial populations are more strongly explained by phage interactions  
657 than abiotic, bottom-up factors. *Environ. Microbiol.* **21**, 2948–2963 (2019).
- 658 39. Hill, T. C. J., Walsh, K. A., Harris, J. A. & Moffett, B. F. Using ecological diversity measures  
659 with bacterial communities. *FEMS Microbiol. Ecol.* **43**, 1–11 (2003).
- 660 40. Vieira, R. P. et al. Relationships between bacterial diversity and environmental variables in  
661 a tropical marine environment, Rio de Janeiro. *Environ. Microbiol.* **10**, 189–199 (2008).
- 662 41. Guyader, S. & Burch, C. L. Optimal foraging predicts the ecology but not the evolution of  
663 host specialization in bacteriophages. *PLoS One* **3**, e1946 (2008).
- 664 42. Walters, K. E. & Martiny, J. B. H. Alpha-, beta-, and gamma-diversity of bacteria varies  
665 across habitats. *PLoS One* **15**, e0233872 (2020).
- 666 43. Kukkaro, P. & Bamford, D. H. Virus-host interactions in environments with a wide range of  
667 ionic strengths. *Environ. Microbiol. Rep.* **1**, 71–77 (2009).
- 668 44. Thingstad, T. F. & Frede Thingstad, T. Elements of a theory for the mechanisms controlling  
669 abundance, diversity, and biogeochemical role of lytic bacterial viruses in aquatic systems.  
670 *Limnology and Oceanography* **45**, 1320–1328 (2000).
- 671 45. Arkhipova, K. et al. Temporal dynamics of uncultured viruses: a new dimension in viral  
672 diversity. *ISME J.* **12**, 199–211 (2018).

- 673 46. Nguyen, B. N. et al. Environmental DNA survey captures patterns of fish and invertebrate  
674 diversity across a tropical seascape. *Sci. Rep.* **10**, 6729 (2020).
- 675 47. Bolger, A. M., Lohse, M. & Usadel, B. Trimmomatic: a flexible trimmer for Illumina  
676 sequence data. *Bioinformatics* **30**, 2114–2120 (2014).
- 677 48. Eren, A. M. et al. Anvi'o: an advanced analysis and visualization platform for 'omics data.  
678 *PeerJ* **3**, e1319 (2015).
- 679 49. Köster, J. & Rahmann, S. Snakemake—a scalable bioinformatics workflow engine.  
680 *Bioinformatics* **34**, 3600 (2018).
- 681 50. Eren, A. M., Vineis, J. H., Morrison, H. G. & Sogin, M. L. A filtering method to generate high  
682 quality short reads using illumina paired-end technology. *PLoS One* **8**, e66643 (2013).
- 683 51. Li, D., Liu, C.-M., Luo, R., Sadakane, K. & Lam, T.-W. MEGAHIT: an ultra-fast single-node  
684 solution for large and complex metagenomics assembly via succinct de Bruijn graph.  
685 *Bioinformatics* **31**, 1674–1676 (2015).
- 686 52. Breitwieser, F. P., Baker, D. N. & Salzberg, S. L. KrakenUniq: confident and fast  
687 metagenomics classification using unique k-mer counts. *Genome Biol.* **19**, 198 (2018).
- 688 53. Kim, D., Song, L., Breitwieser, F. P. & Salzberg, S. L. Centrifuge: rapid and sensitive  
689 classification of metagenomic sequences. *Genome Res.* **26**, 1721–1729 (2016).
- 690 54. Hyatt, D. et al. Prodigal: prokaryotic gene recognition and translation initiation site  
691 identification. *BMC Bioinformatics* **11**, 119 (2010).
- 692 55. Altschul, S. F., Gish, W., Miller, W., Myers, E. W. & Lipman, D. J. Basic local alignment  
693 search tool. *J. Mol. Biol.* **215**, 403–410 (1990).
- 694 56. Guo, J. et al. VirSorter2: a multi-classifier, expert-guided approach to detect diverse DNA  
695 and RNA viruses. *Microbiome* **9**, 37 (2021).
- 696 57. Nayfach, S. et al. CheckV assesses the quality and completeness of metagenome-  
697 assembled viral genomes. *Nat. Biotechnol.* **39**, 578–585 (2021).
- 698 58. Martinez-Gutierrez, C. A. & Aylward, F. O. Phylogenetic signal, congruence, and



- 699 uncertainty across bacteria and archaea. *Mol. Biol. Evol.* **38**, 5514–5527 (2021).
- 700 59. Shen, W., Le, S., Li, Y. & Hu, F. SeqKit: A Cross-Platform and Ultrafast Toolkit for  
701 FASTA/Q File Manipulation. *PLoS One* **11**, e0163962 (2016).
- 702 60. Li, H. Minimap2: pairwise alignment for nucleotide sequences. *Bioinformatics* **34**, 3094–  
703 3100 (2018).
- 704 61. Woodcroft, B. J. *CoverM: Read coverage calculator for metagenomics*.  
705 <https://github.com/wwood/CoverM>
- 706 62. Weinheimer, A. R. & Aylward, F. O. Infection strategy and biogeography distinguish  
707 cosmopolitan groups of marine jumbo bacteriophages. *ISME J.* **16**, 1657–1667 (2022).
- 708 63. R Core Team. *R: A Language and Environment for Statistical Computing*. R Foundation for  
709 Statistical Computing, Vienna, Austria (2019).
- 710 64. RStudio. <https://rstudio.com>. Accessed 12 Oct 2021.
- 711 65. Dixon, P. VEGAN, a package of R functions for community ecology. *J. Veg. Sci.* **14**, 927–  
712 930 (2003).
- 713 66. Kassambara, A. 'ggplot2' Based Publication Ready Plots [R package ggpubr version 0.4.0].  
714 (2020). <https://cran.r-project.org/package=ggpubr>.
- 715 67. Wickham, H. *et al.* ggplot2: elegant graphics for data analysis. Springer-Verlag New York.  
716 <https://ggplot2.tidyverse.org> (2016).
- 717 68. Kielbasa, S. M., Wan, R., Sato, K., Horton, P. & Frith, M. C. Adaptive seeds tame genomic  
718 sequence comparison. *Genome Res.* **21**, 487–493 (2011).

## 719 **Figure Legends**

720

721 **Figure 1. Overview of project design with maps of sample locations.** (a) World map with  
722 Panama denoted as red star. (b) Map of sample sites from the Tropical Western Atlantic (TWA)  
723 coast of Panama. (c) Map of sample sites from Tropical Eastern Pacific (TEP) coast of Panama.  
724 (f) Map of TEP mangrove samples zoomed in on those collected along two freshwater rivers



725 and the nearby reef samples. (e) Graphical abstract of project approaches. Green triangles are  
726 mangrove samples. Purple circles are reef samples.

727

728 **Figure 2. Comparisons of phage and prokaryotic community composition and endemism**  
729 **in marine habitats of the Tropical Western Atlantic (TWA) and Tropical Eastern Pacific**  
730 **(TEP).** NMDS plots of samples based on phage or prokaryote community composition (Bray-  
731 Curtis distance), overlaid with environmental parameters significantly varying with community  
732 variation. Solid lines correspond to p-values below 0.01 and dashed below 0.05. Bottom  
733 barcharts compare the proportion of phages endemic to an environment or shared between  
734 them (in gray). (O - dissolved oxygen, S - salinity, T - temperature). Salinity represents total  
735 dissolved solids and specific conductivity, as these variables directly correlated with each other  
736 in this dataset.

737

738 **Figure 3. Genus composition of phage putative host communities and prokaryote**  
739 **communities.** Stacked barplots of the phage putative host communities (a) or prokaryotic  
740 communities (c) colored and sorted by top ten average most abundant genera. Color strips on  
741 bottom indicate ocean and habitat where samples were collected: top row: navy = TEP; orange  
742 = TWA; green = mangroves; pink = reefs. (b,d) the average putative host genera composition  
743 (b) or prokaryotic genera composition (c) of ocean and habitat type combination EPM = TEP  
744 mangrove, ERP = TEP reef, WAM = TWA mangrove, WAR = TWA reef.

745

746 **Figure 4. Phage and prokaryotic Shannon's Diversity in marine habitats of the Tropical**  
747 **Western Atlantic and the Tropical Eastern Pacific.** 2a,b,d,e,g,h are violin plots of Shannon's  
748 Diversity of phages and prokaryotes in different samples. 2c,f,i are scatterplots of phage  
749 Shannon's Diversity plotted against prokaryotic Shannon's Diversity in a sample, with linear  
750 regression lines drawn and standard deviations shaded in gray. (Shan. Div. = Shannon's

751 Diversity).

752

753 **Figure 5.** Bubble plot of correlations between measured physicochemical parameters (x-axis)  
754 and phage and prokaryotic diversity (y-axis) of the habitats in each ocean (color strips). Color  
755 and size of dot correspond to correlation strength. Stars correspond to p value significance (\* <  
756 0.05, \*\* < 0.01, \*\*\* < 0.001). Abbreviations: T - temperature, S - salinity, O - dissolved oxygen,  
757 Prok - prokaryote, R - reef, M - mangrove. Color strips: blue = TEP, orange = TWA, purple =  
758 reef, green = mangrove.

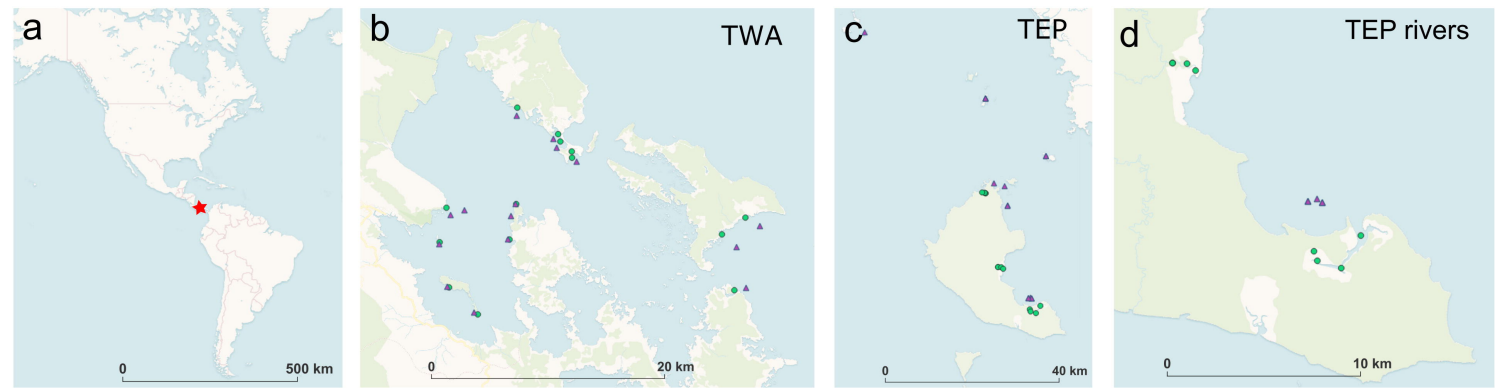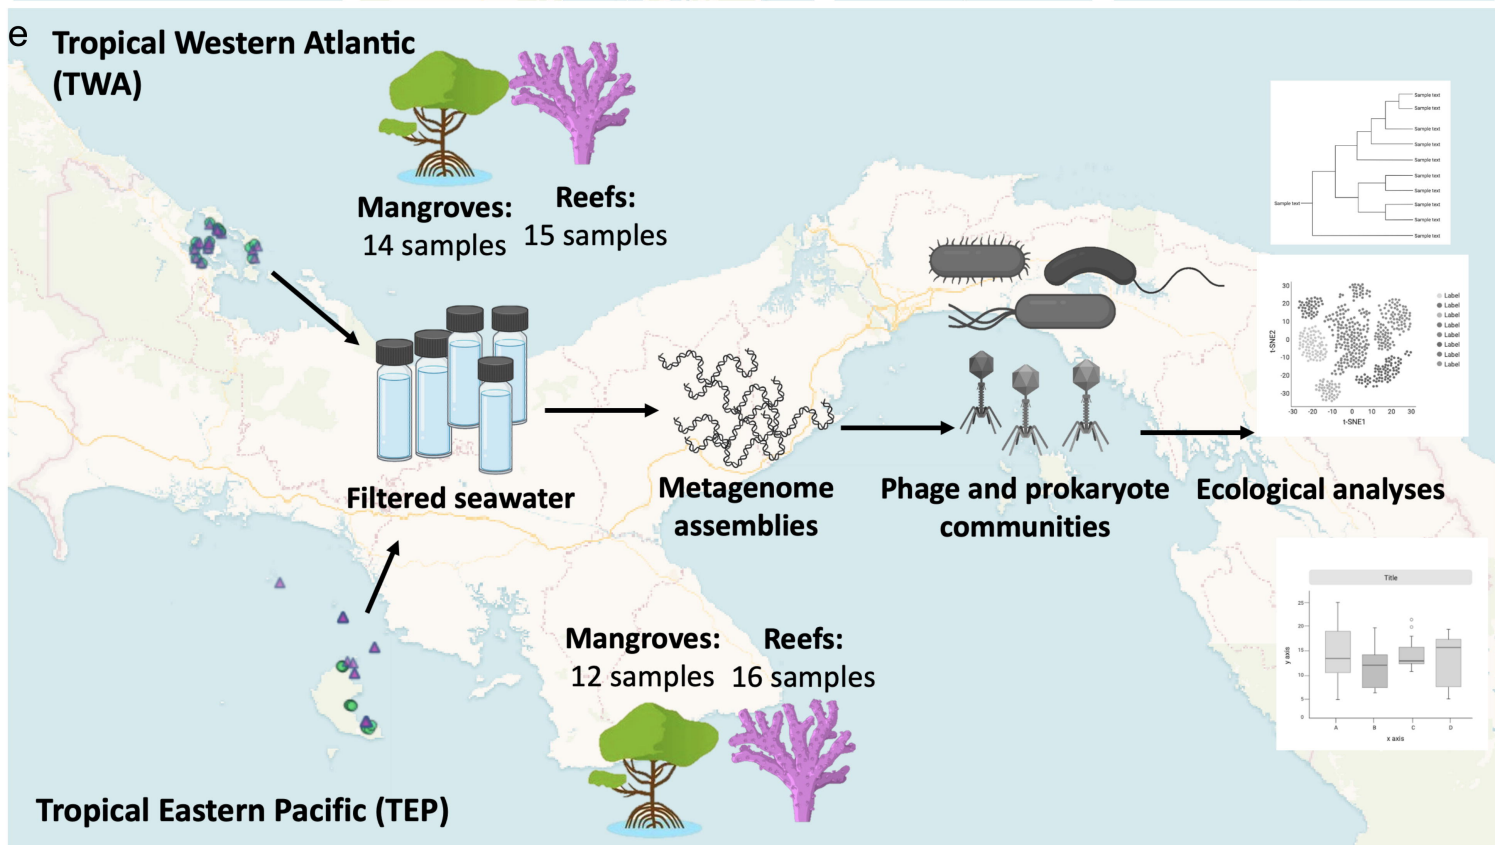

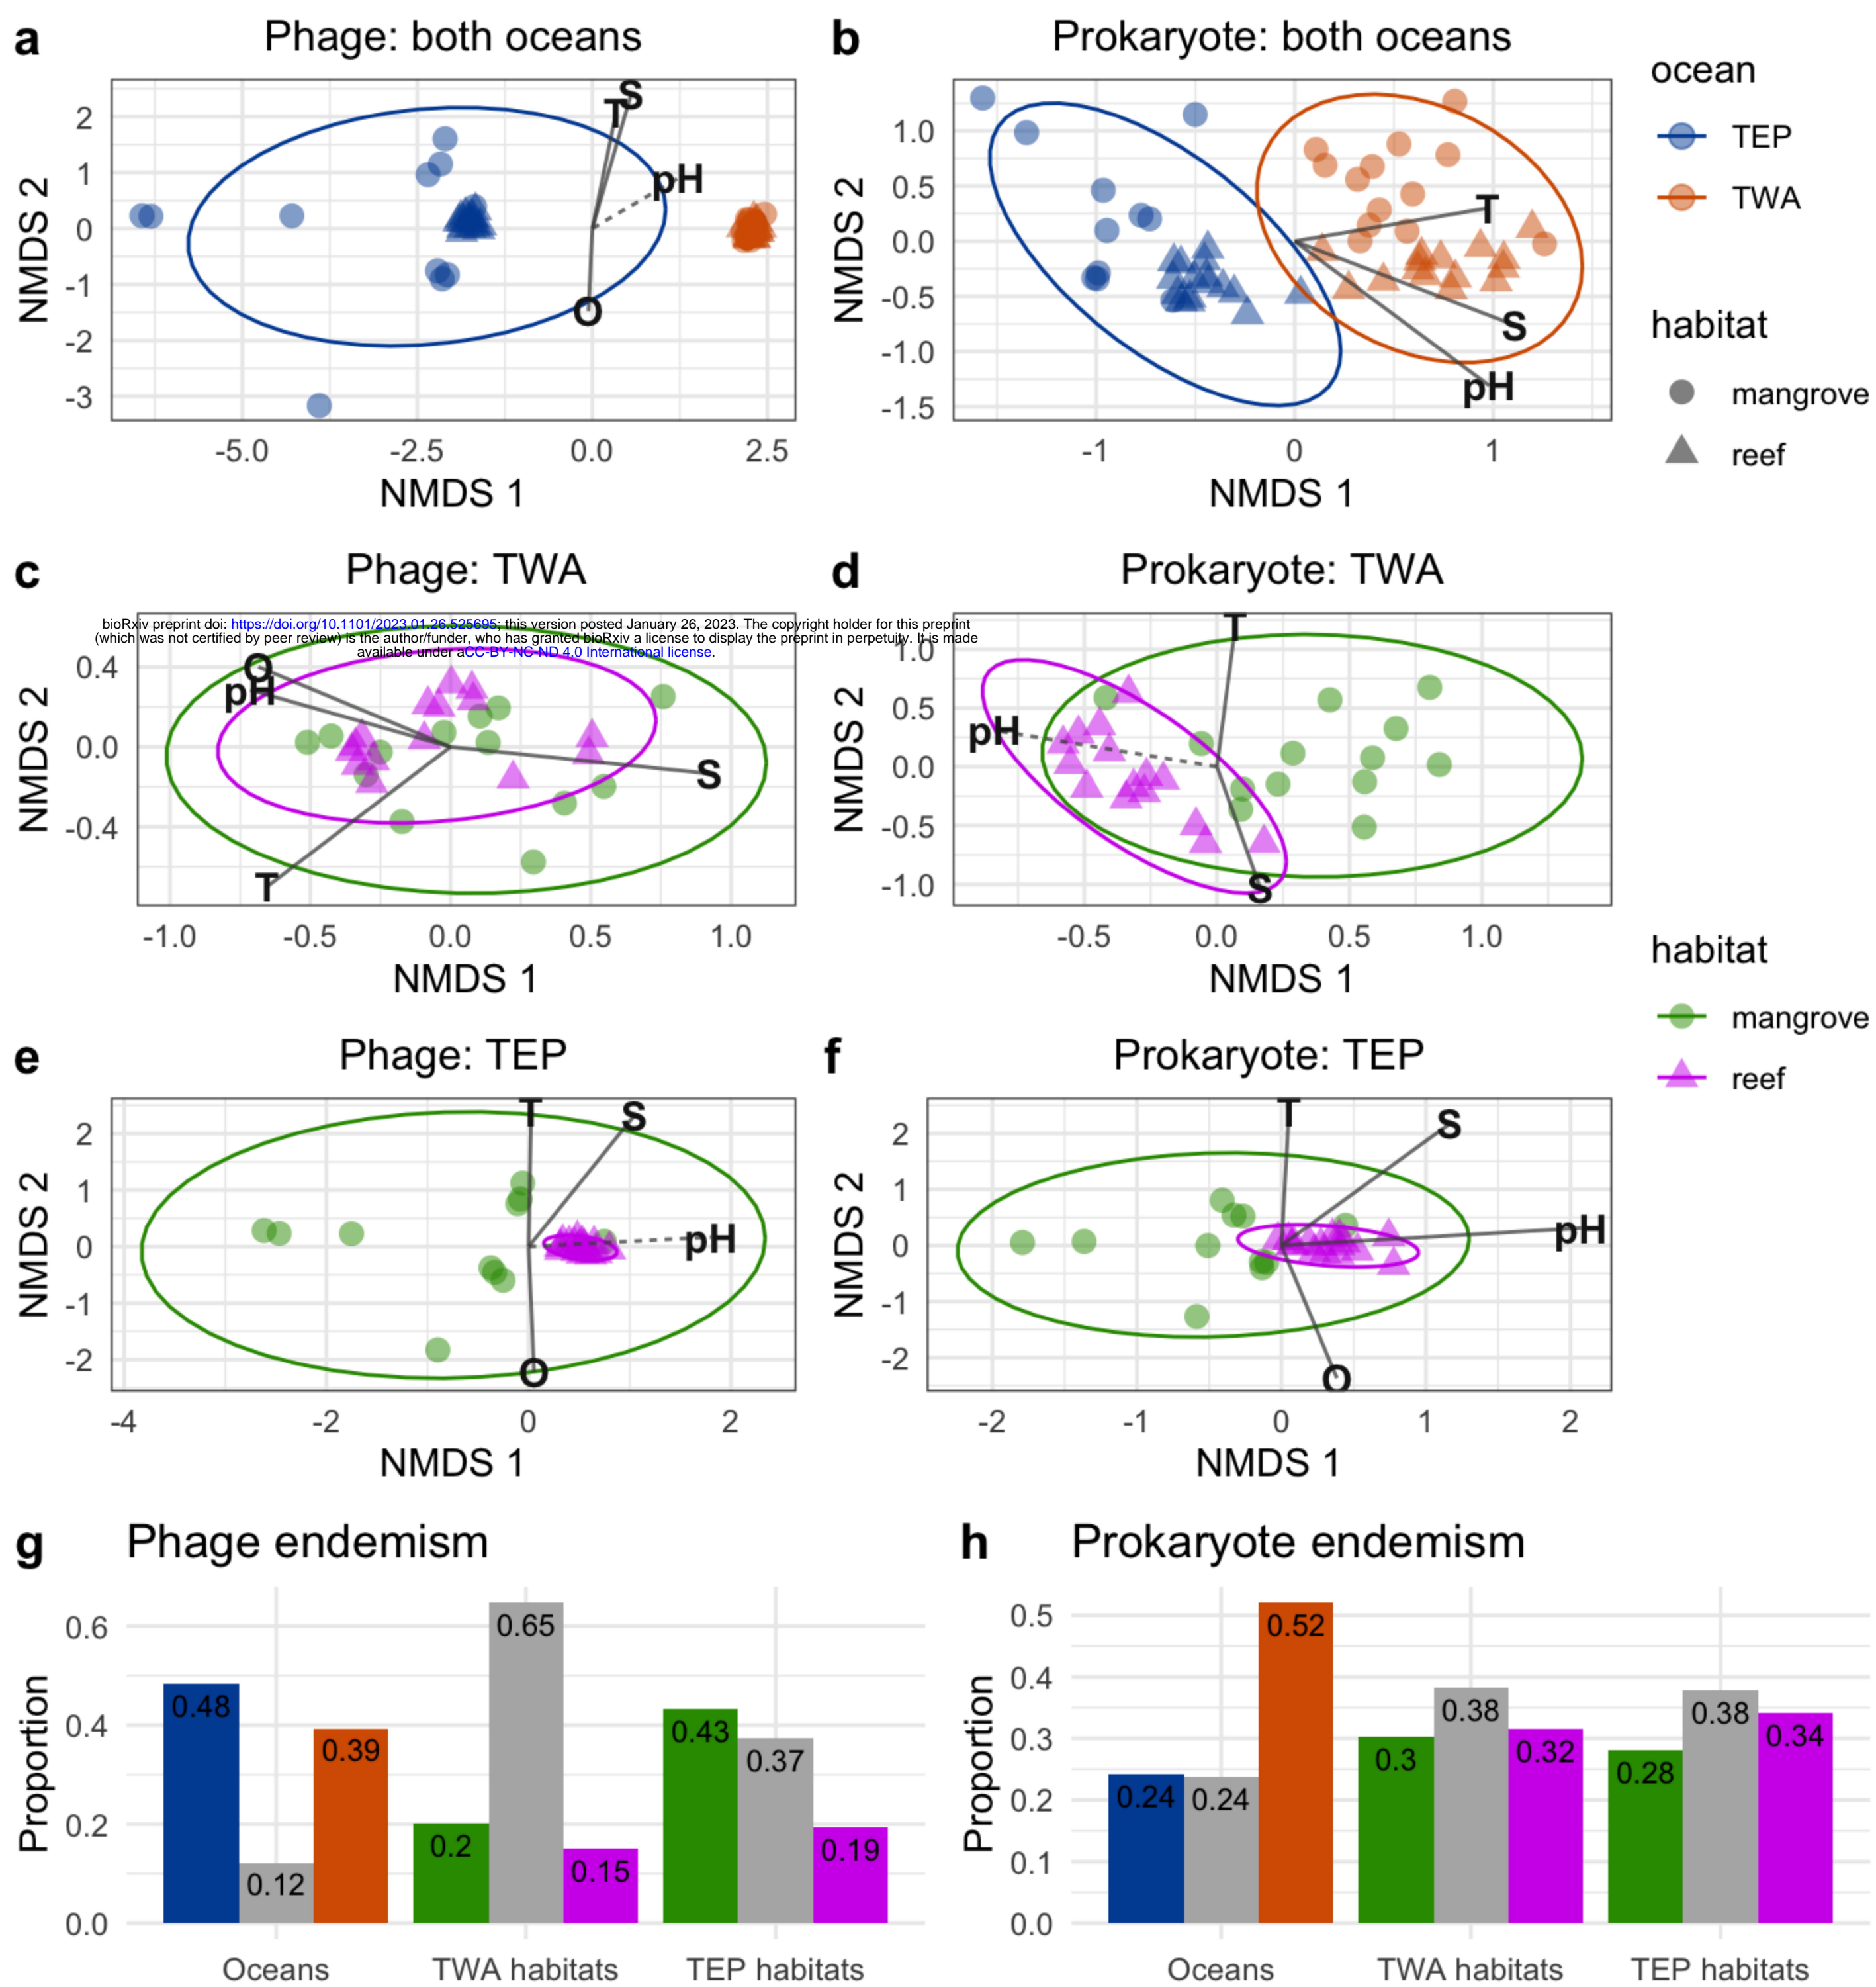



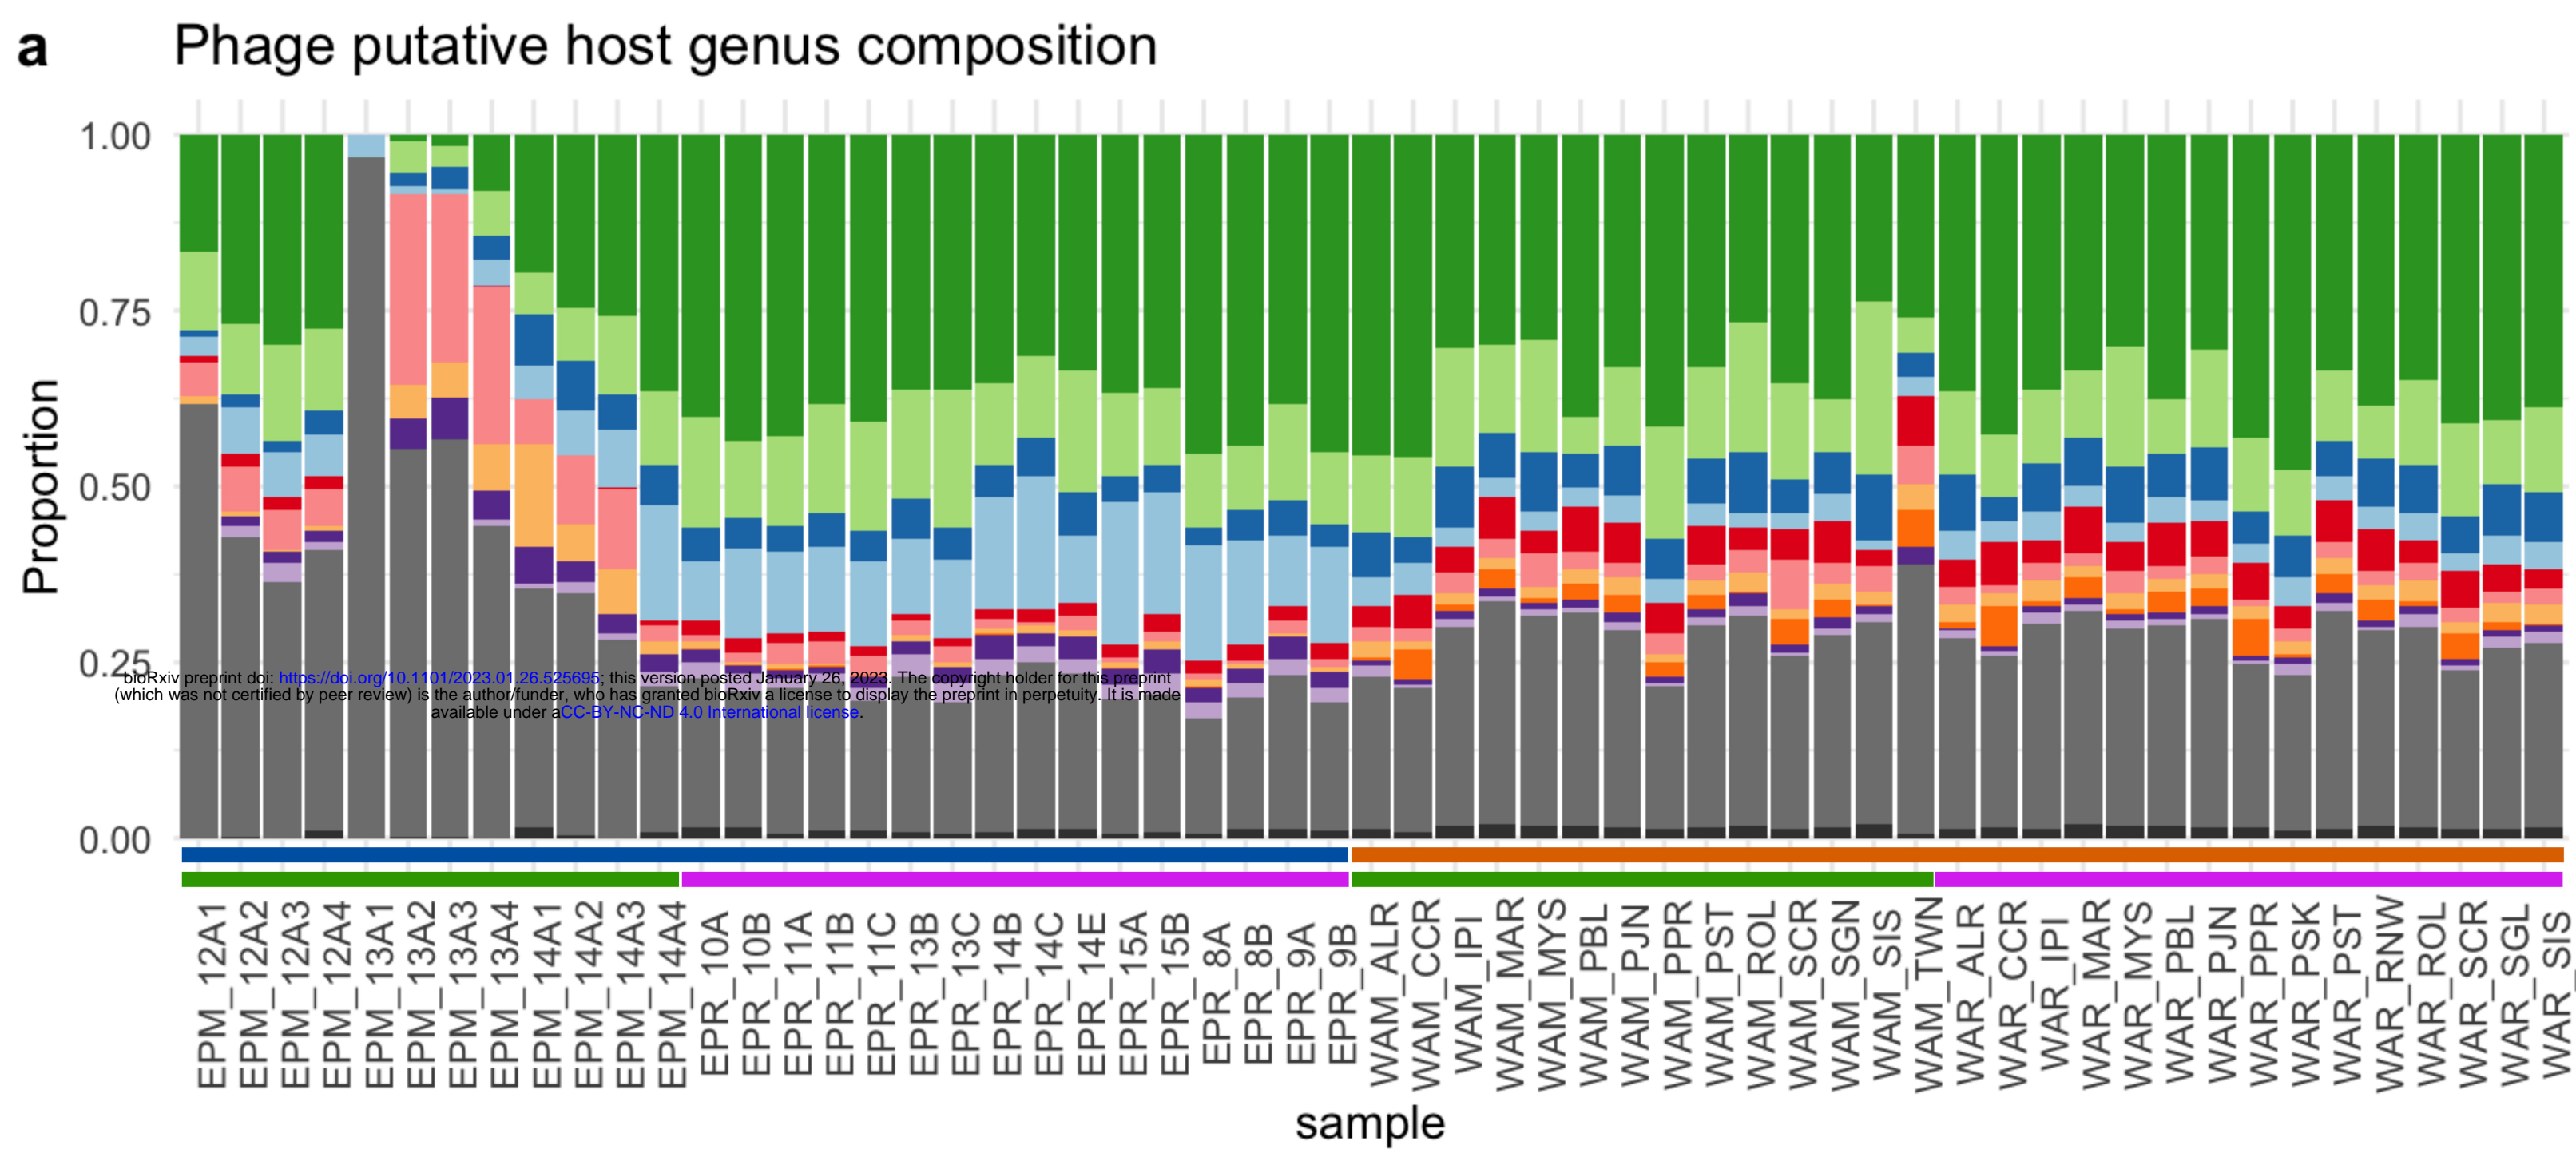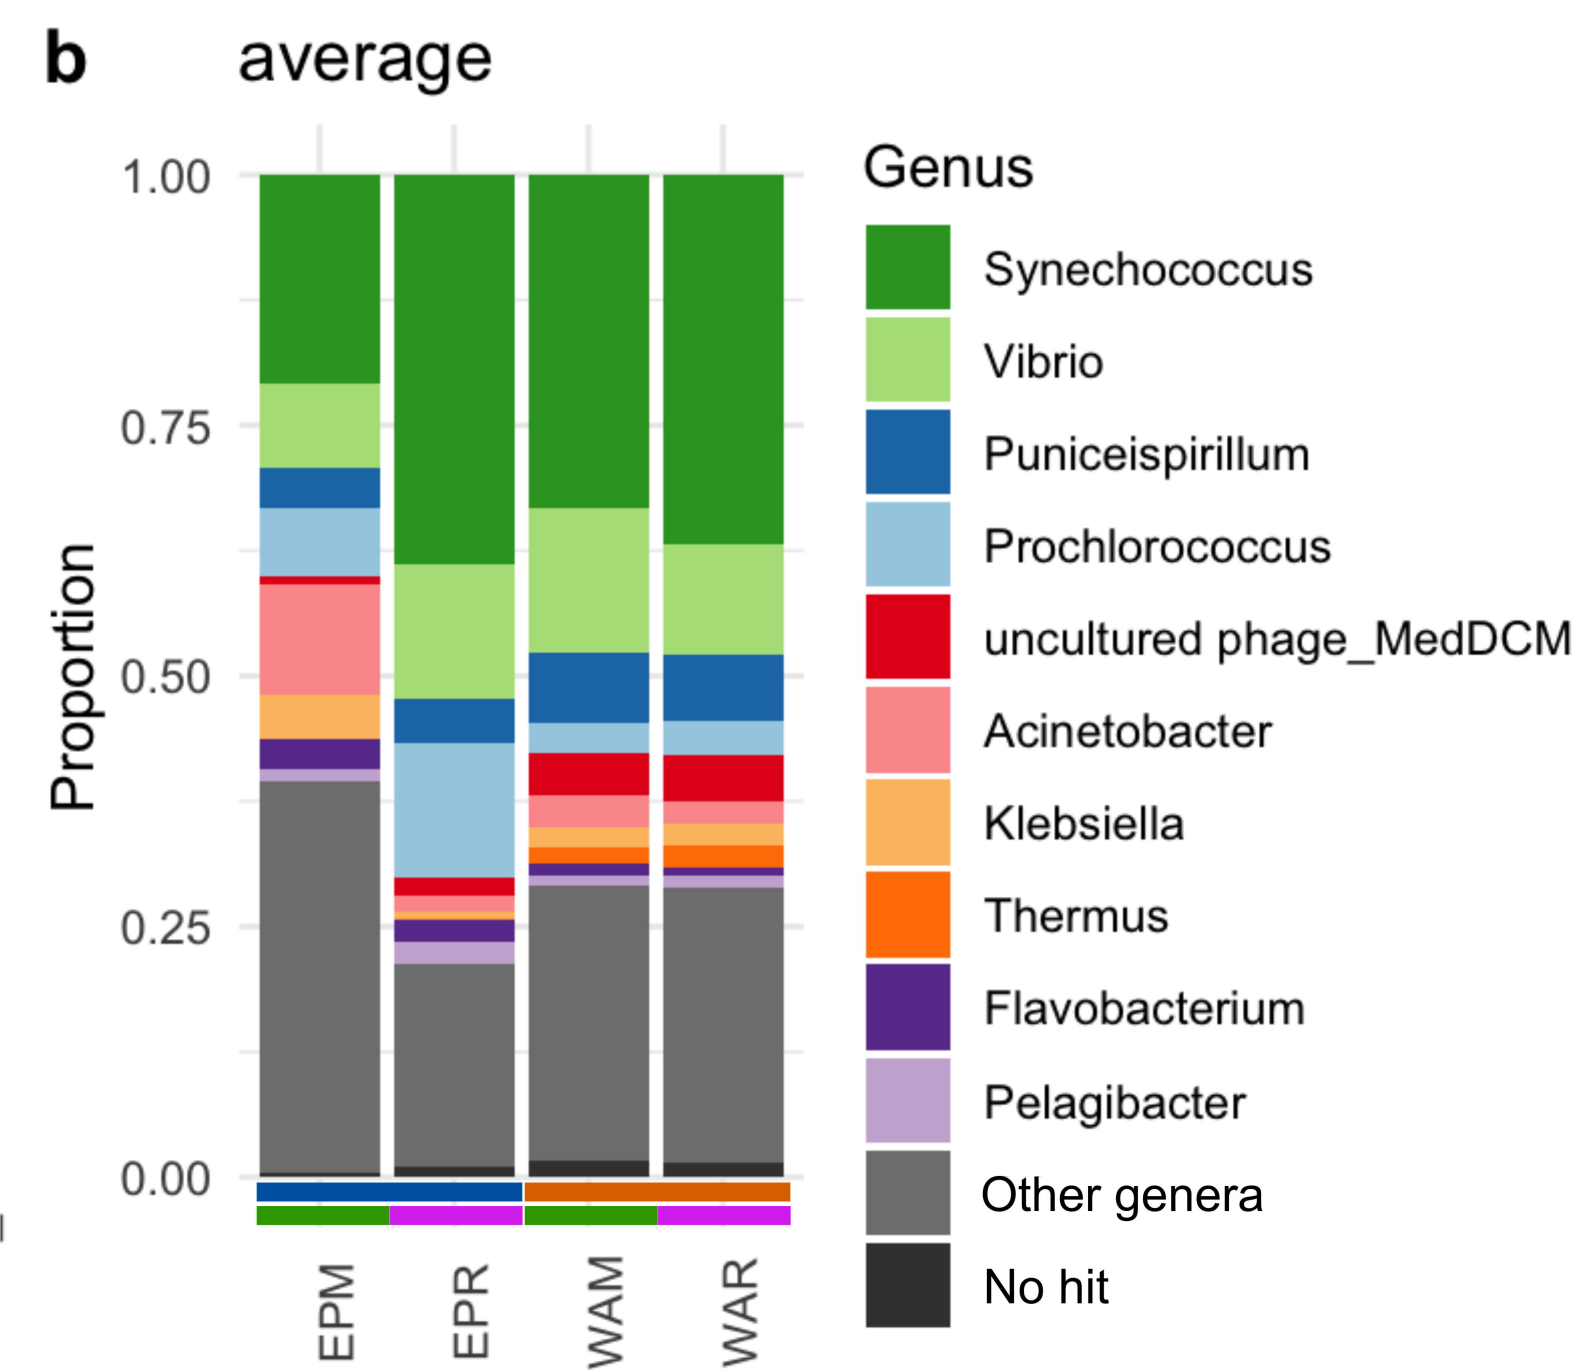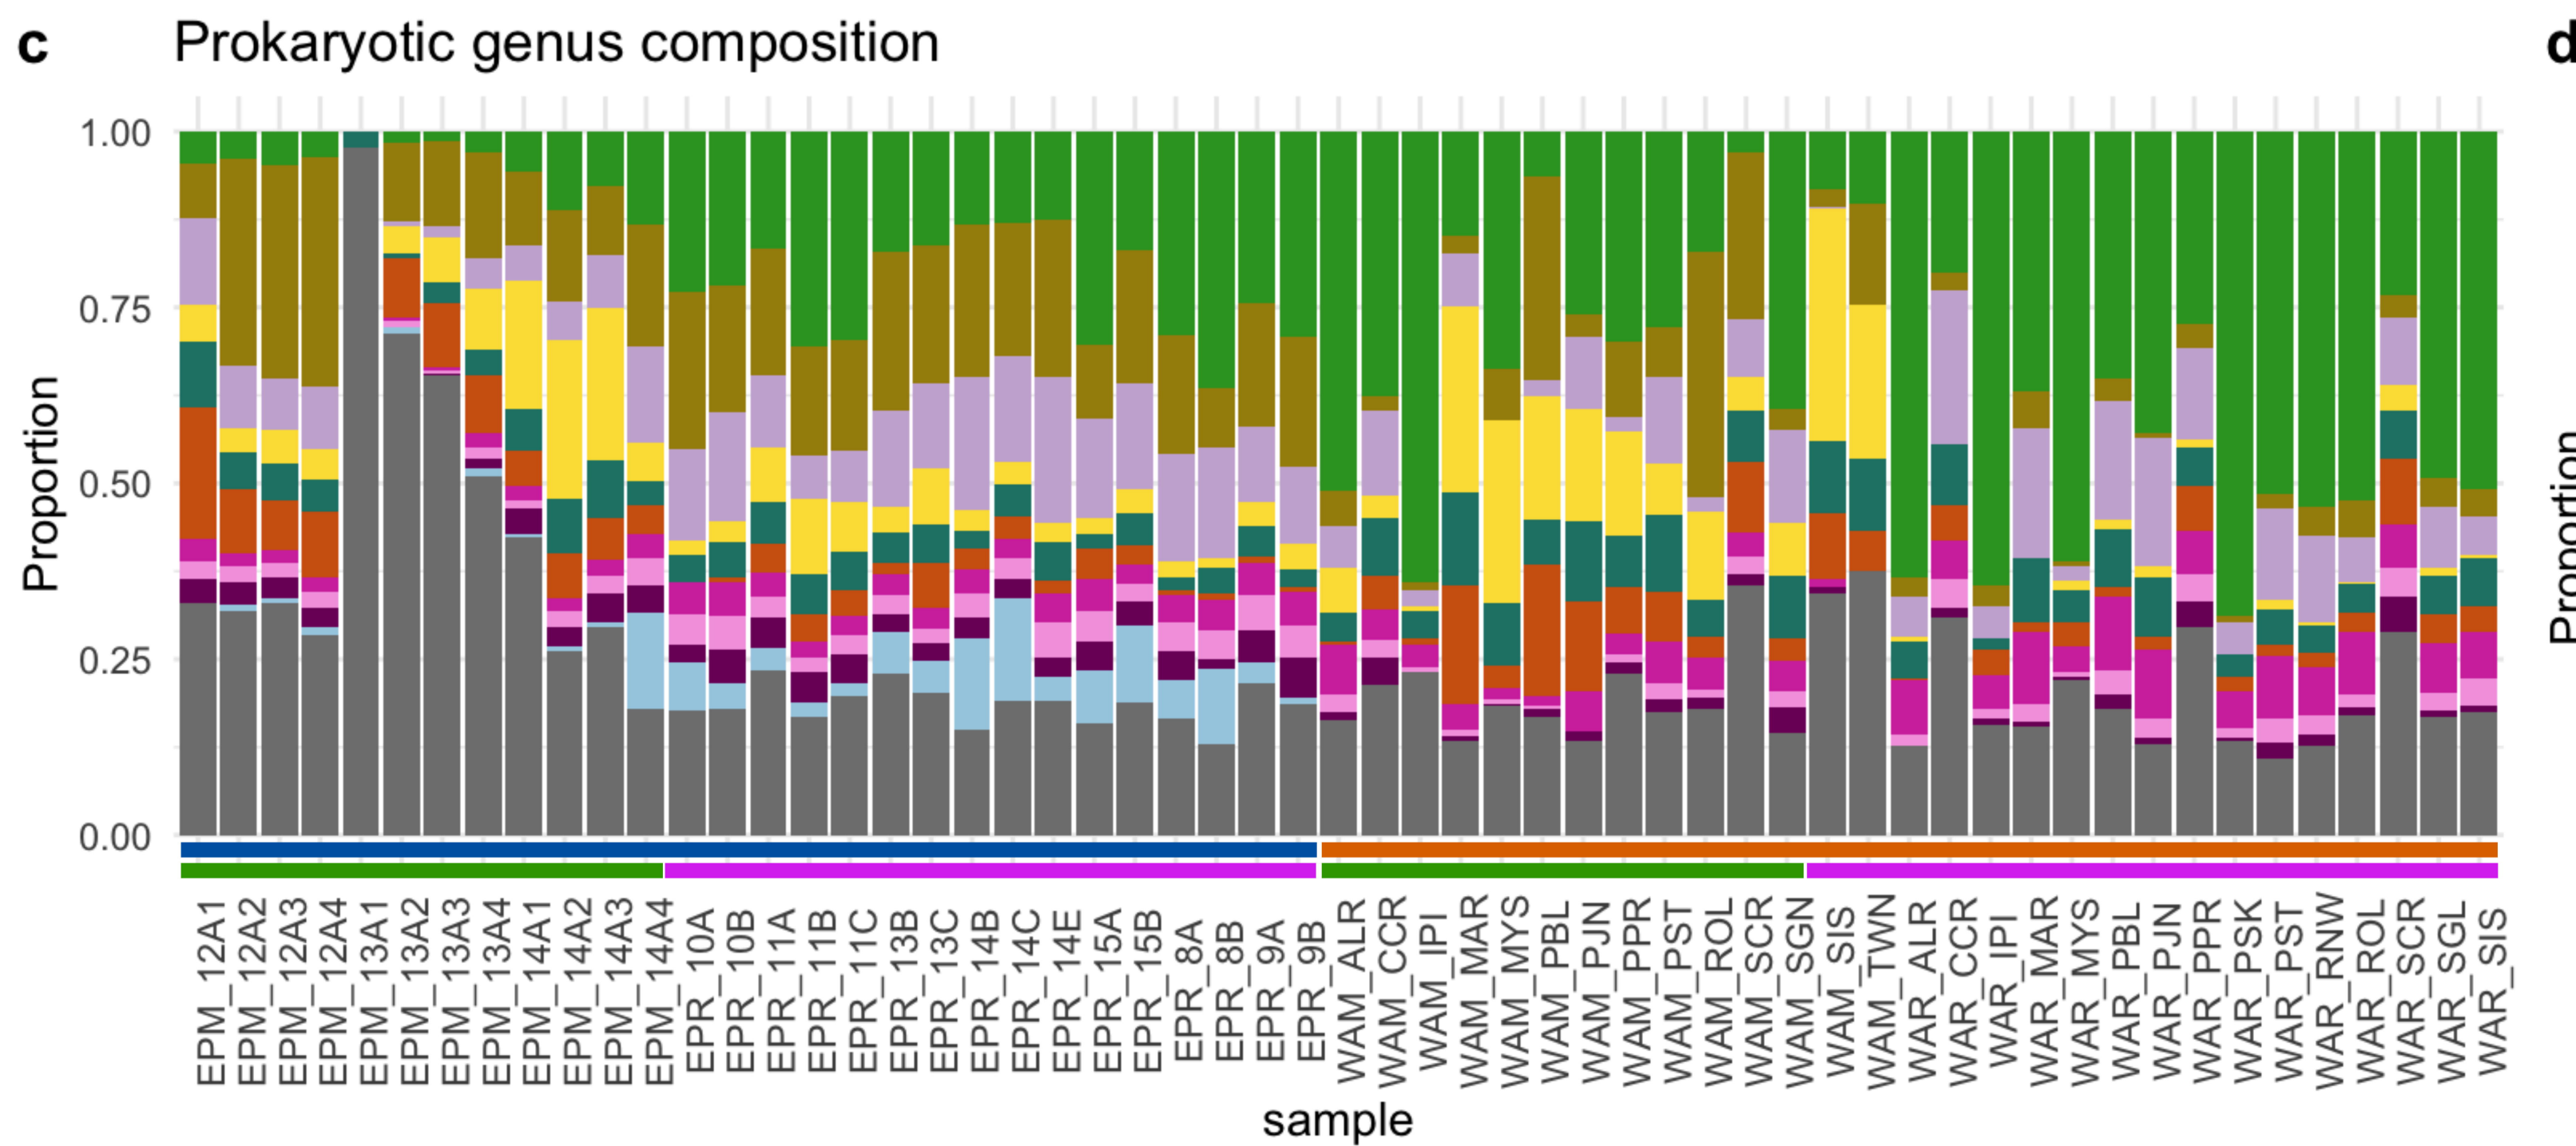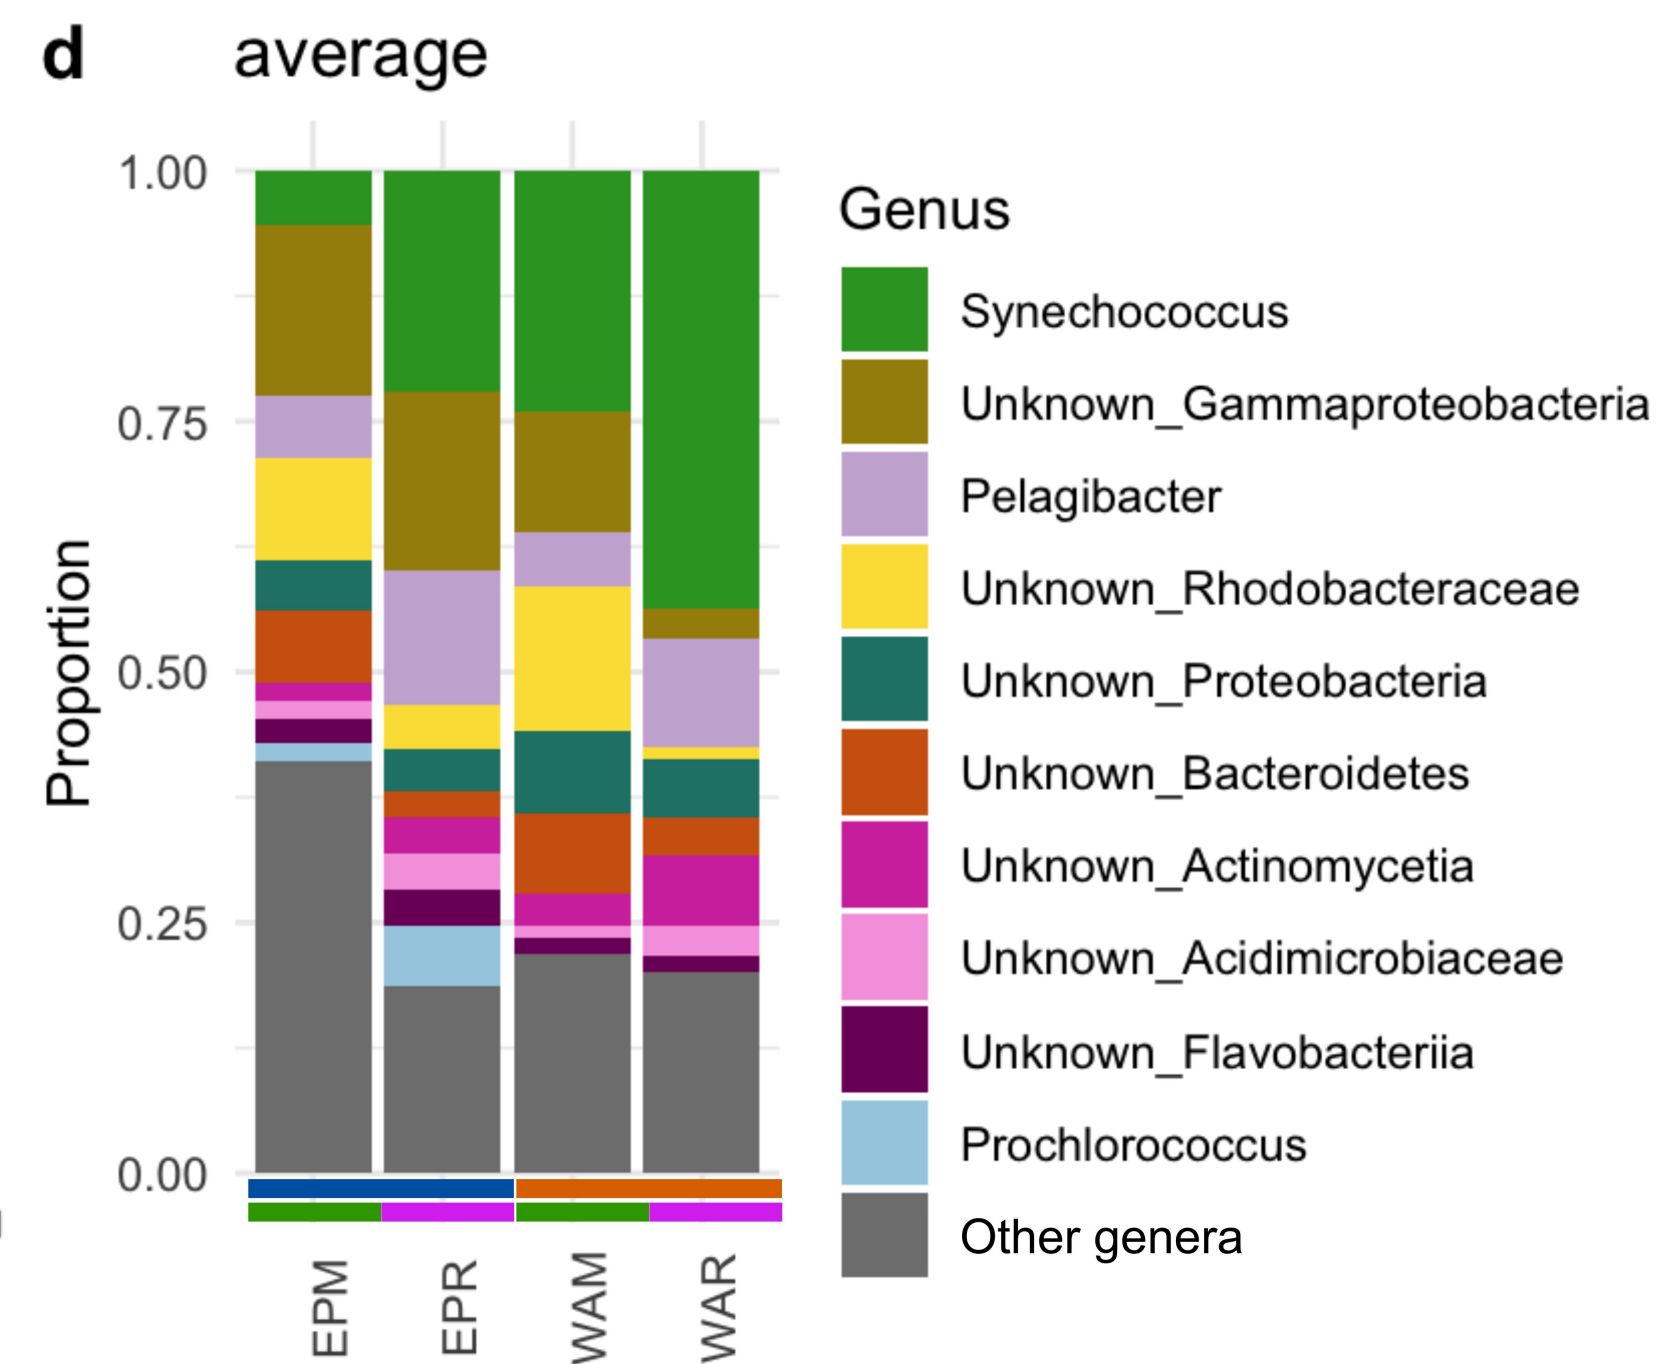

## Both Oceans

ocean ● TEP ● TWA

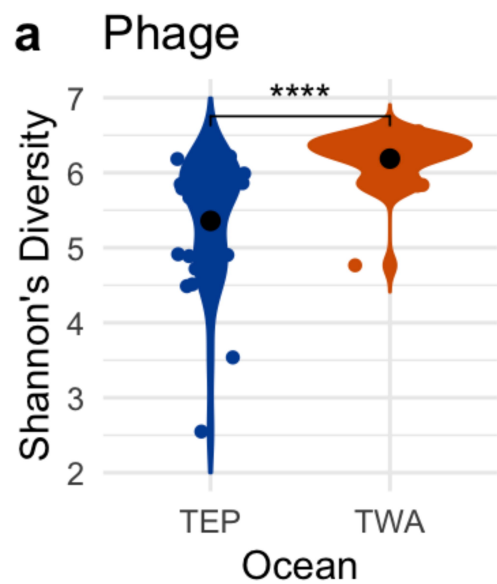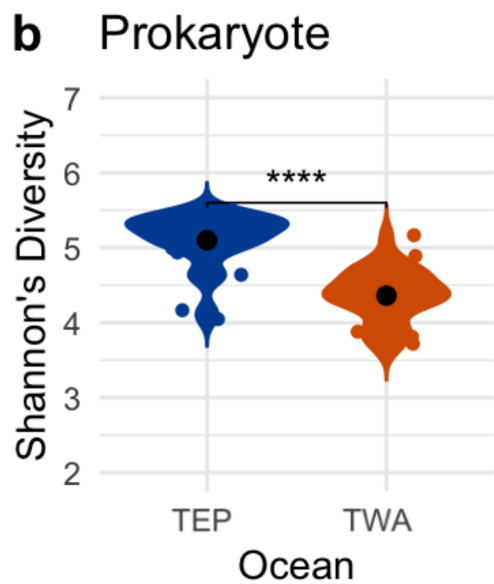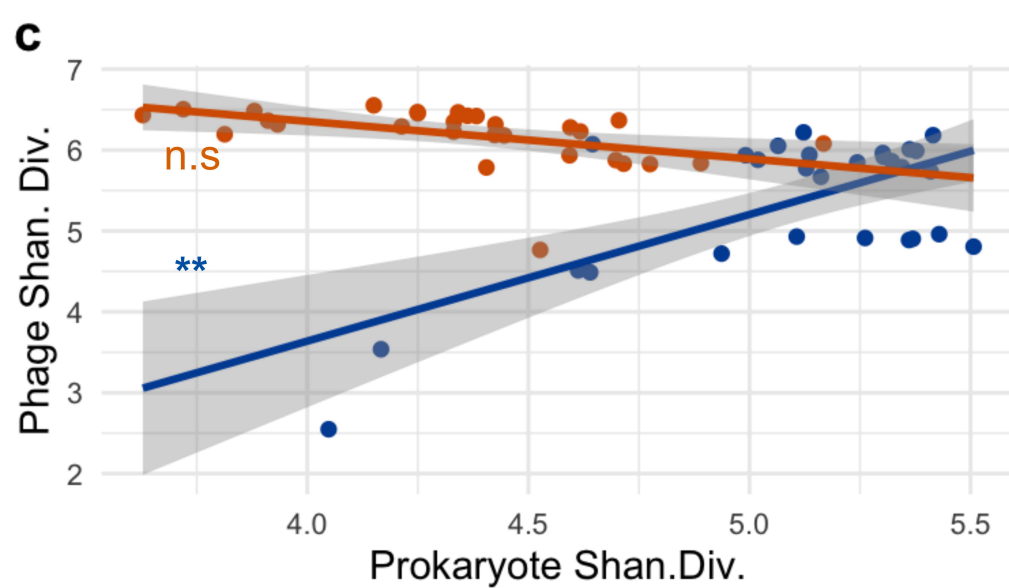

## Tropical Western Atlantic

habitat ● mangrove ▲ reef

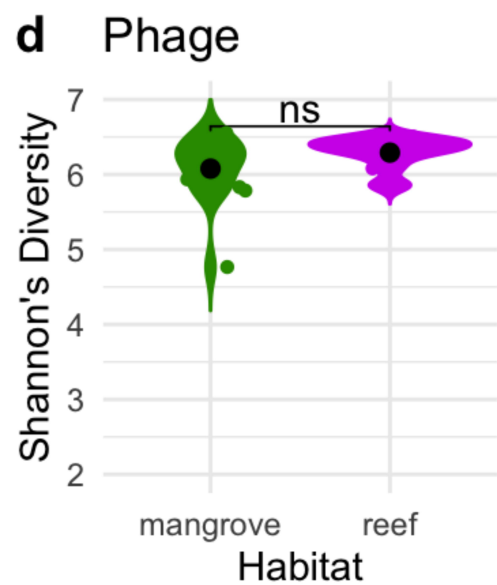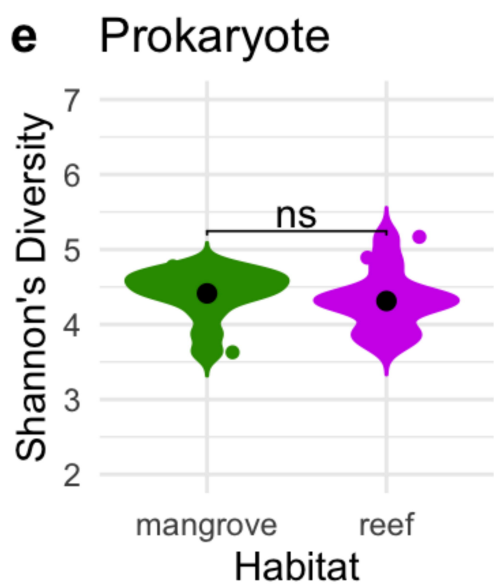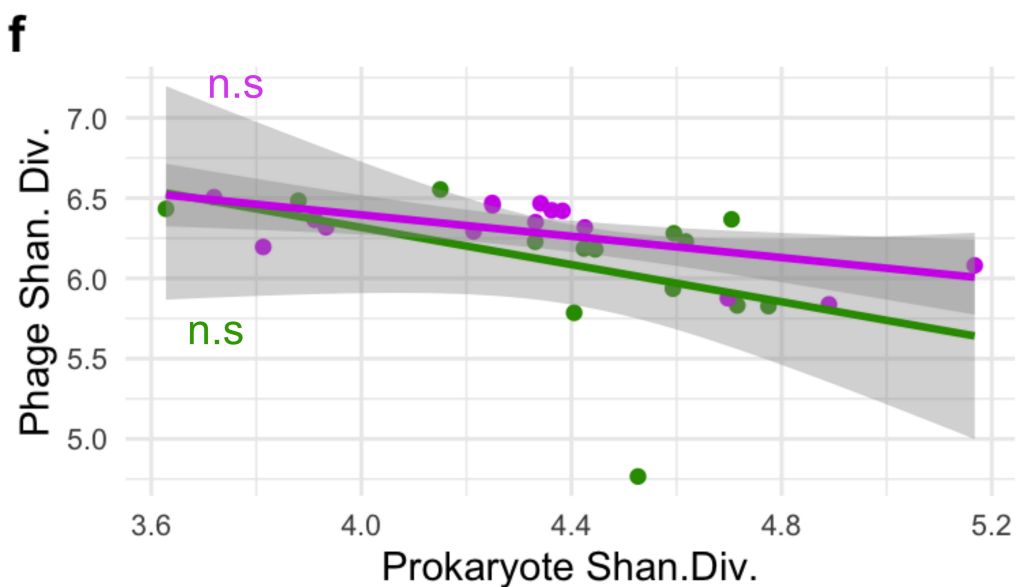

## Tropical Eastern Pacific

habitat ● mangrove ▲ reef

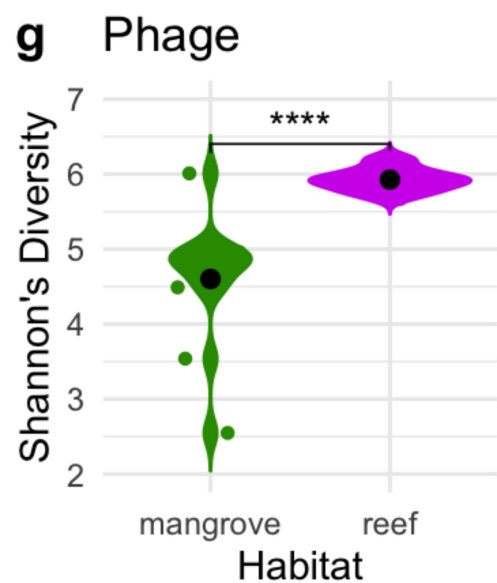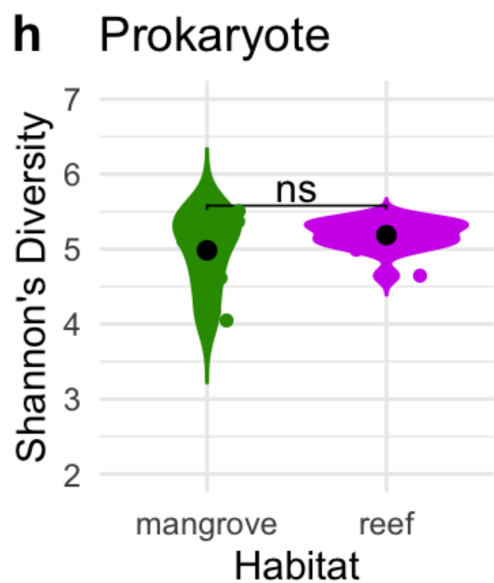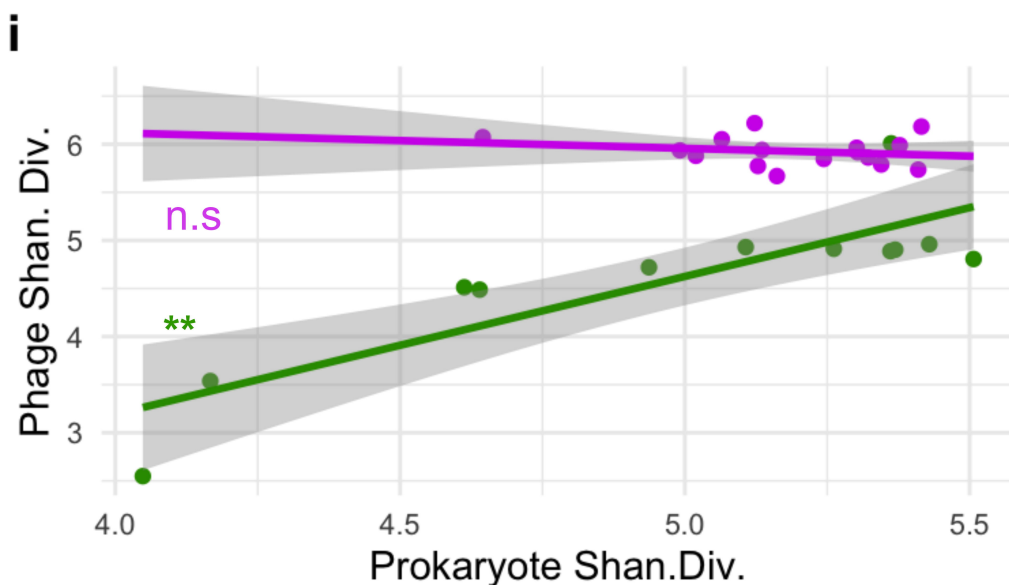

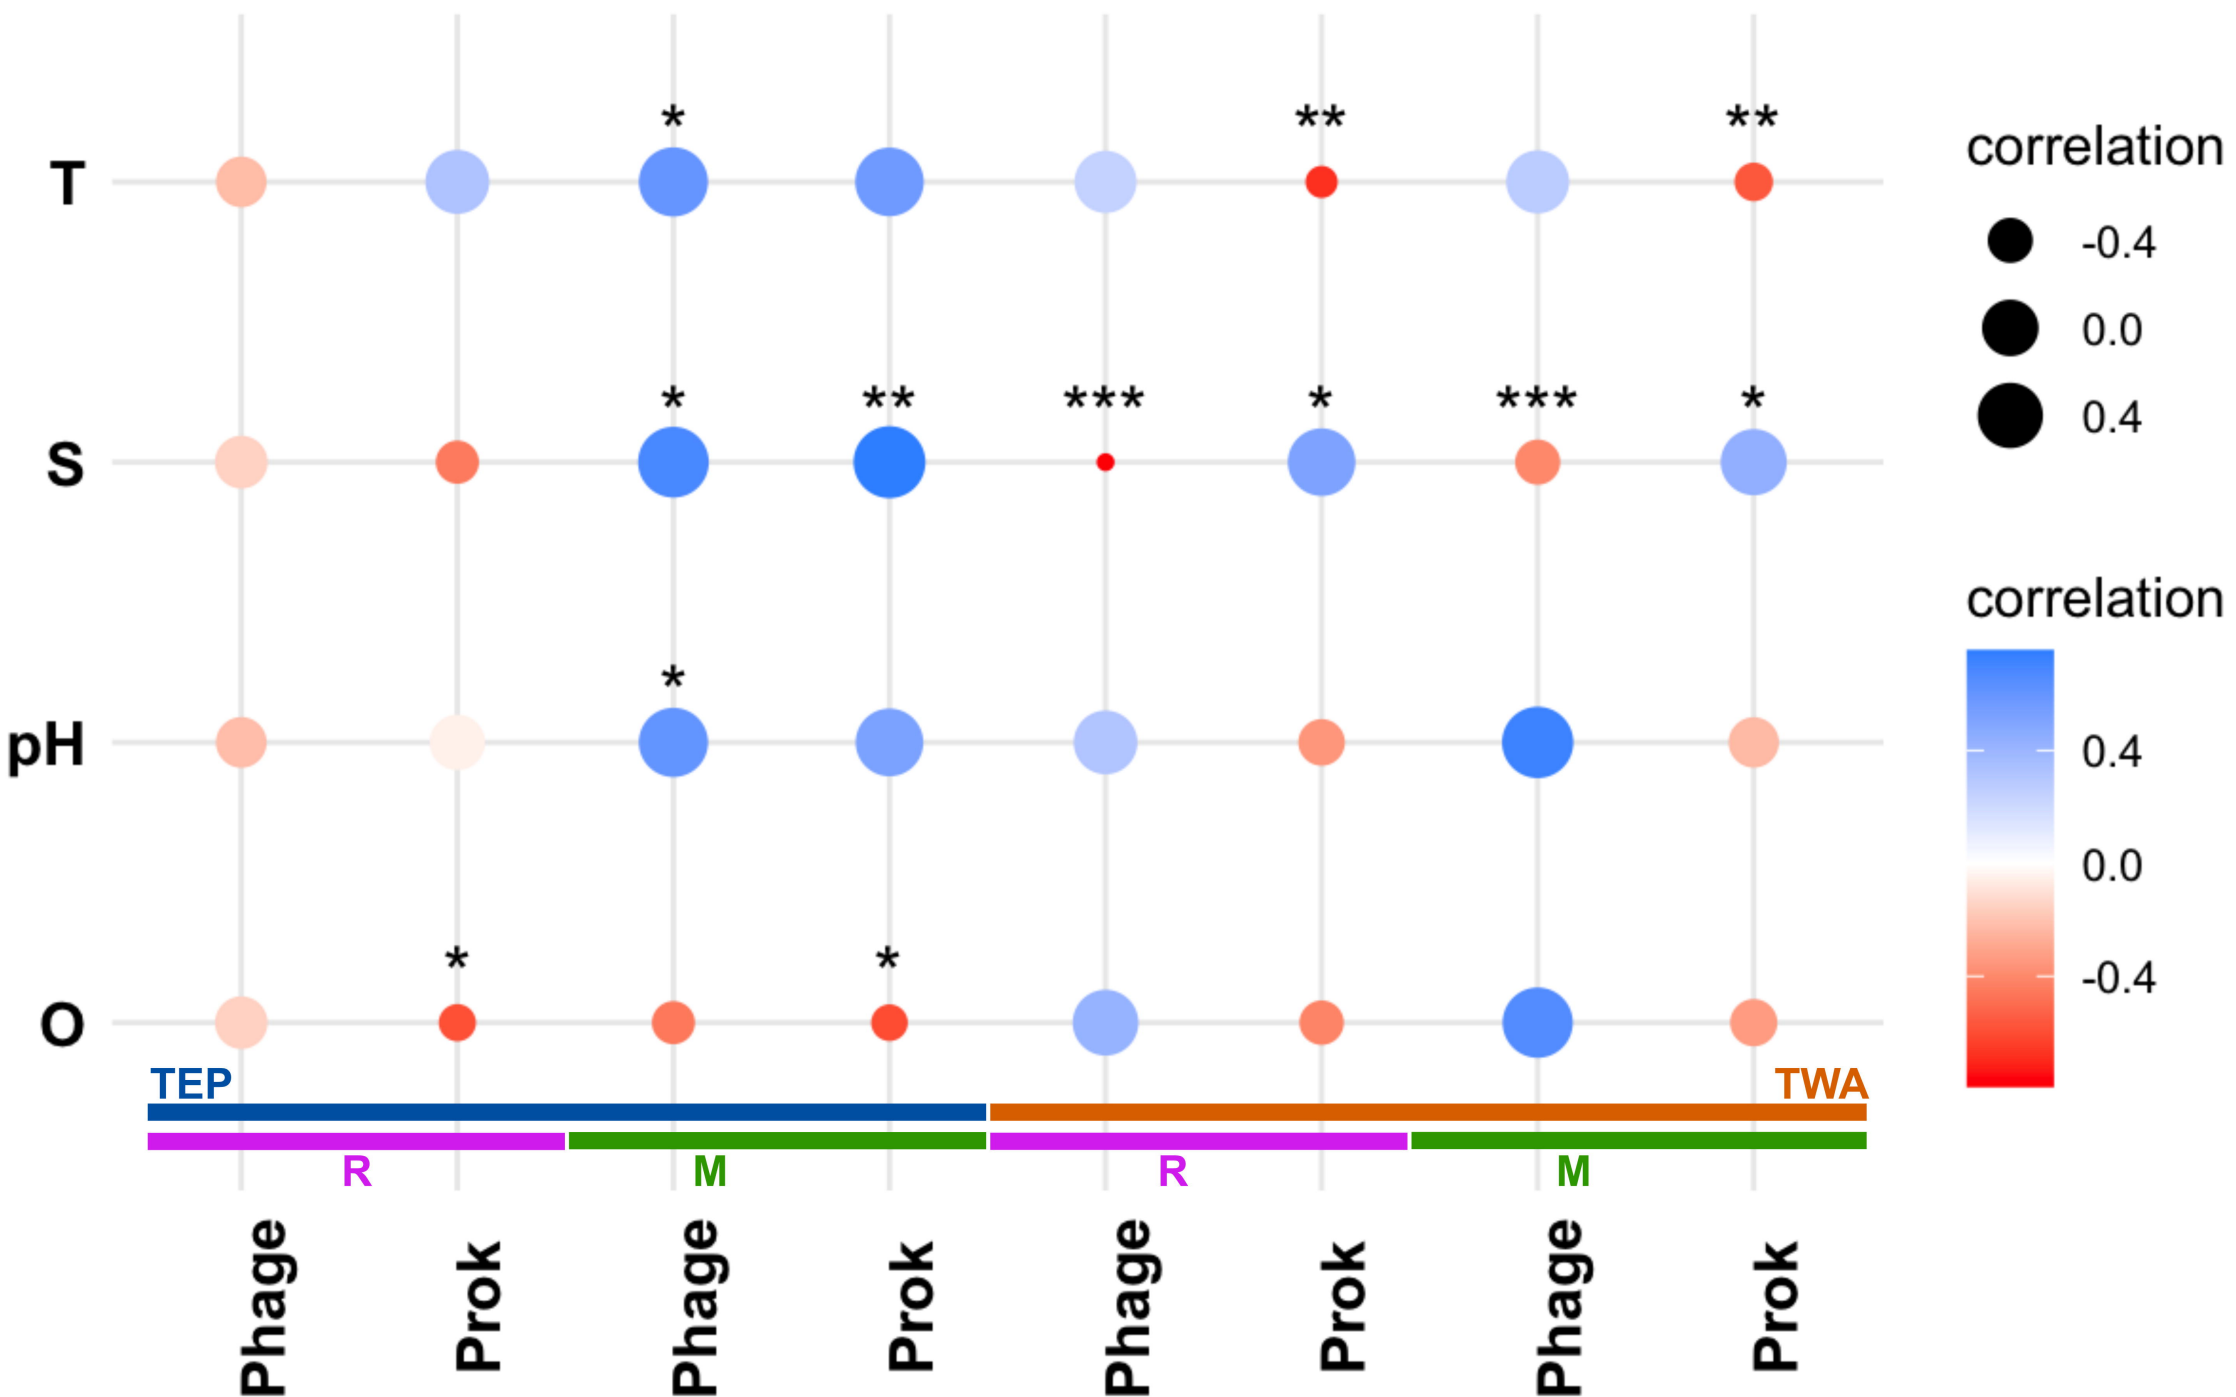

Source: https://www.biorxiv.org/content/early/2023/01/26/2023.01.26.525695.full.pdf
